# Supplementary material for: Codweb: Whole-genome sequencing uncovers extensive reticulations fueling adaptation among Atlantic, Arctic, and Pacific gadids
Source: PubMed Central journal article supplement — Sci Adv. 2019 Mar 20;5(3):eaat8788. doi: 10.1126/sciadv.aat8788 (PMC6426462; doi:10.1126/sciadv.aat8788), 2019-03-20
Supplement: aat8788_SM.pdf [file aat8788_SM.pdf]

## Supplementary Materials for

### **Codweb: Whole-genome sequencing uncovers extensive reticulations fueling adaptation among Atlantic, Arctic, and Pacific gadids**

Einar Árnason\* and Katrín Halldórsdóttir\*

\*Corresponding author. Email: einararn@hi.is (E.Á.); katrinhalldorsdottir@gmail.com (K.H.)

Published 20 March 2019, *Sci. Adv.* **5**, eaat8788 (2019)

DOI: 10.1126/sciadv.aat8788

#### **This PDF file includes:**

Fig. S1. Principal components analysis of whole-genome variation among Pacific, Arctic, and Atlantic cods.

Fig. S2. Phylogenetic networks, root mismatch, and ghost effects.

Fig. S3. Phylogenetic networks, further examples.

Fig. S4. Sampling localities of Pacific, Arctic, and Atlantic gadids on a world map centered on the Arctic.

Table S1. ABBA-BABA *D* test for the whole genome of six gadid species with Arctic cod as the root.

Table S2. ABBA-BABA *D* test for the whole genome of six gadid species with Polar cod as the root.

Table S3. ABBA-BABA *D* test for individual linkage groups of six gadid species with Arctic cod as the root.

Table S4.  $D_{\text{FOIL}}$  statistics of admixture and introgression.

Table S5. Summary statistics of sequencing coverage.

Table S6. Number of parsimony informative sites, number of blocks of 5000 parsimony-informative characters, and number of mdl generated “recombinational genes” used in the SNaQ (32) analysis of different linkage groups.

## SI Figs

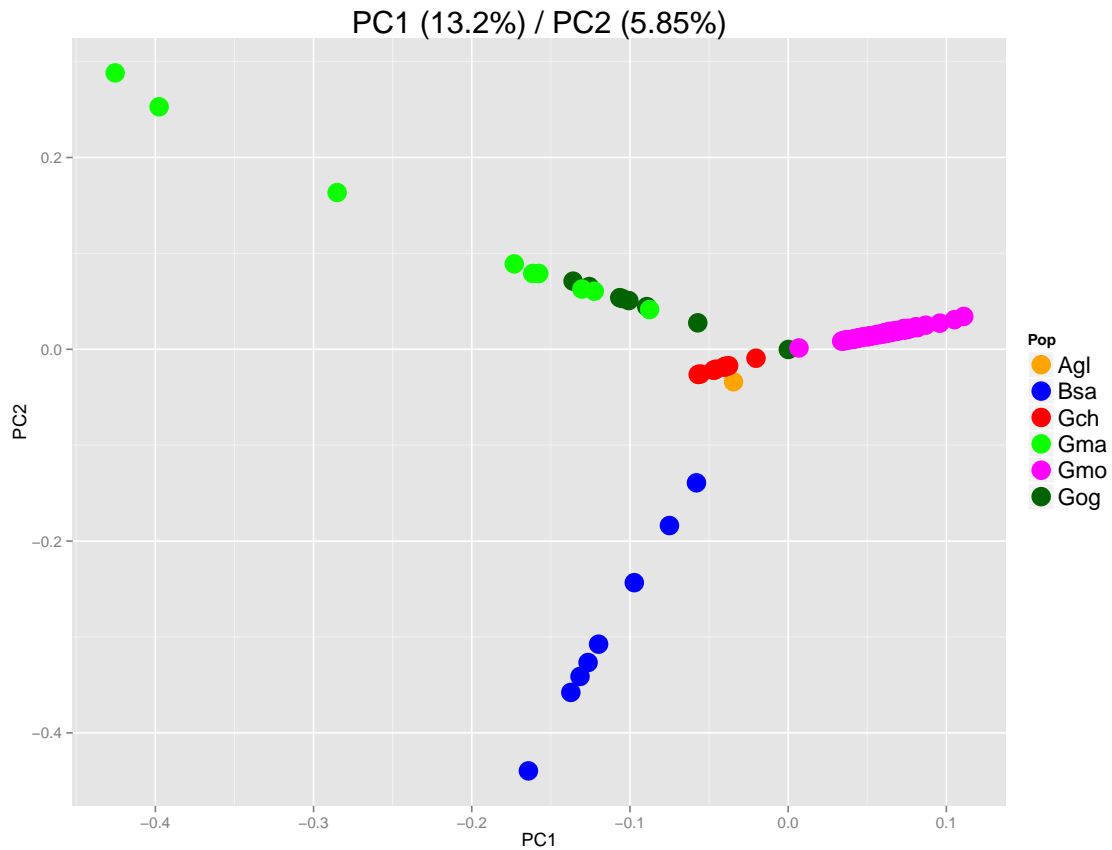





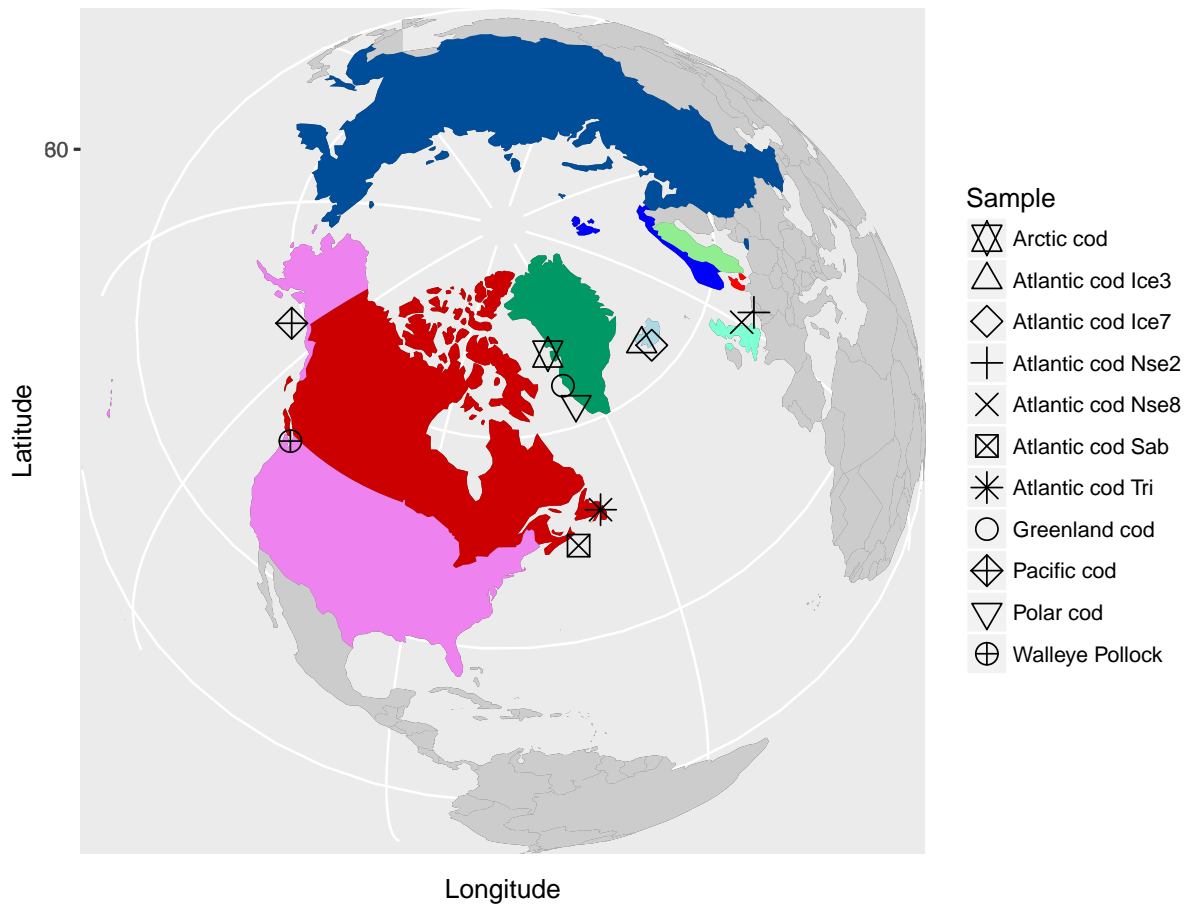

**Fig. S4. Sampling localities of Pacific, Arctic, and Atlantic gadids on a world map centered on the Arctic.** Except for Polar cod these individuals were sequenced at high coverage. The Atlantic cod individuals from Sable Bank (Sab) of Nova Scotia, Trinity Bay (Tri) off Newfoundland, Iceland (Ice), and North Sea (Nse) were combined to represent Atlantic cod in the ABBA-BABA tests and treated individually in the phylonetwork analysis.

## SI Tables

**Table S1. ABBA-BABA  $D$  test for the whole genome of six gadid species with Arctic cod as the root.**  $D$  is the ABBA-BABA four-taxon test statistic, JK  $D$  is the jackknife estimate of  $D$ , VJK  $D$  is the variance of the JK  $D$ ,  $Z$  is  $Z$  score,  $P_{BY}$  is the probability of the  $Z$  score adjusted to account for multiple testing using the method of (57),  $nABBA$  and  $nBABA$  are the numbers of ABBA and BABA patterns respectively, Bl is the number of 5 Mb blocks,  $H^*$  are the names of the four populations in the specific tree with  $H_4$  as the outgroup ( $((H_1, H_2), H_3), H_4$ ). The taxa are Atlantic cod, Walleye Pollock, Greenland cod, Pacific cod, Polar cod, and Arctic cod as outgroup. Based on high coverage data (with lower coverage for Polar cod) using the ANGSD multi population ABBA-BABA test (`-doAbbababa2 1`).  $D$  is the standardized difference  $D = nABBA - nBABA$ . A negative value of  $D$  means that  $H_1$  is closer to  $H_3$  than  $H_2$  is. A positive value of  $D$  means that  $H_2$  is closer to  $H_3$  than  $H_1$  is. Based on transversions with transitions removed.

|              | $D$   | JK $D$ | VJK $D$ | $Z$     | $P_{BY}$ | $nABBA$ | $nBABA$ | Bl  | $H_1$     | $H_2$     | $H_3$     | $H_4$  |
|--------------|-------|--------|---------|---------|----------|---------|---------|-----|-----------|-----------|-----------|--------|
| Whole genome | 0.06  | 0.06   | 0.0000  | 15.38   | 0.000    | 195392  | 174832  | 131 | Atlantic  | Walleye   | Pacific   | Arctic |
|              | 0.04  | 0.04   | 0.0000  | 10.14   | 0.000    | 190539  | 176573  | 131 | Atlantic  | Walleye   | Greenland | Arctic |
|              | -0.18 | -0.18  | 0.0000  | -46.25  | 0.000    | 32168   | 46338   | 131 | Atlantic  | Walleye   | Polar     | Arctic |
|              | -0.57 | -0.57  | 0.0001  | -58.70  | 0.000    | 195392  | 709836  | 131 | Atlantic  | Pacific   | Walleye   | Arctic |
|              | 0.92  | 0.92   | 0.0000  | 434.10  | 0.000    | 1751048 | 70781   | 131 | Atlantic  | Pacific   | Greenland | Arctic |
|              | -0.19 | -0.19  | 0.0000  | -46.27  | 0.000    | 45170   | 65686   | 131 | Atlantic  | Pacific   | Polar     | Arctic |
|              | -0.57 | -0.57  | 0.0001  | -58.95  | 0.000    | 190539  | 698147  | 131 | Atlantic  | Greenland | Walleye   | Arctic |
|              | 0.93  | 0.93   | 0.0000  | 443.71  | 0.000    | 1751048 | 63843   | 131 | Atlantic  | Greenland | Pacific   | Arctic |
|              | -0.19 | -0.19  | 0.0000  | -47.31  | 0.000    | 44217   | 64852   | 131 | Atlantic  | Greenland | Polar     | Arctic |
|              | -0.80 | -0.80  | 0.0000  | -161.67 | 0.000    | 32168   | 291864  | 131 | Atlantic  | Polar     | Walleye   | Arctic |
|              | -0.63 | -0.63  | 0.0000  | -97.00  | 0.000    | 45170   | 199157  | 131 | Atlantic  | Polar     | Pacific   | Arctic |
|              | -0.64 | -0.64  | 0.0000  | -98.31  | 0.000    | 44217   | 199538  | 131 | Atlantic  | Polar     | Greenland | Arctic |
|              | -0.60 | -0.60  | 0.0001  | -76.71  | 0.000    | 174832  | 709836  | 131 | Walleye   | Pacific   | Atlantic  | Arctic |
|              | 0.93  | 0.93   | 0.0000  | 408.75  | 0.000    | 1689437 | 64981   | 131 | Walleye   | Pacific   | Greenland | Arctic |
|              | -0.06 | -0.06  | 0.0000  | -17.31  | 0.000    | 47394   | 53704   | 131 | Walleye   | Pacific   | Polar     | Arctic |
|              | -0.60 | -0.60  | 0.0001  | -75.28  | 0.000    | 176573  | 698147  | 131 | Walleye   | Greenland | Atlantic  | Arctic |
|              | 0.93  | 0.93   | 0.0000  | 400.71  | 0.000    | 1689437 | 63010   | 131 | Walleye   | Greenland | Pacific   | Arctic |
|              | -0.07 | -0.07  | 0.0000  | -17.48  | 0.000    | 46593   | 53193   | 131 | Walleye   | Greenland | Polar     | Arctic |
|              | -0.73 | -0.73  | 0.0000  | -123.97 | 0.000    | 46338   | 291864  | 131 | Walleye   | Polar     | Atlantic  | Arctic |
|              | -0.62 | -0.62  | 0.0000  | -100.18 | 0.000    | 47394   | 204504  | 131 | Walleye   | Polar     | Pacific   | Arctic |
|              | -0.63 | -0.63  | 0.0000  | -100.10 | 0.000    | 46593   | 203908  | 131 | Walleye   | Polar     | Greenland | Arctic |
|              | 0.05  | 0.05   | 0.0000  | 21.00   | 0.000    | 70781   | 63843   | 131 | Pacific   | Greenland | Atlantic  | Arctic |
|              | 0.02  | 0.02   | 0.0000  | 6.56    | 0.000    | 64981   | 63010   | 131 | Pacific   | Greenland | Walleye   | Arctic |
|              | -0.01 | -0.01  | 0.0000  | -1.09   | 1.000    | 12084   | 12217   | 131 | Pacific   | Greenland | Polar     | Arctic |
|              | -0.50 | -0.50  | 0.0001  | -70.02  | 0.000    | 65686   | 199157  | 131 | Pacific   | Polar     | Atlantic  | Arctic |
|              | -0.58 | -0.58  | 0.0000  | -92.42  | 0.000    | 53704   | 204504  | 131 | Pacific   | Polar     | Walleye   | Arctic |
|              | -0.96 | -0.96  | 0.0000  | -601.77 | 0.000    | 12084   | 561269  | 131 | Pacific   | Polar     | Greenland | Arctic |
|              | -0.51 | -0.51  | 0.0001  | -71.22  | 0.000    | 64852   | 199538  | 131 | Greenland | Polar     | Atlantic  | Arctic |
|              | -0.59 | -0.59  | 0.0000  | -93.06  | 0.000    | 53193   | 203908  | 131 | Greenland | Polar     | Walleye   | Arctic |
|              | -0.96 | -0.96  | 0.0000  | -587.45 | 0.000    | 12217   | 561269  | 131 | Greenland | Polar     | Pacific   | Arctic |

**Table S2. ABBA-BABA  $D$  test for the whole genome of six gadid species with Polar cod as the root.**  $D$  is the ABBA-BABA four-taxon test statistic, JK  $D$  is the jackknife estimate of  $D$ , VJK  $D$  is the variance of the JK  $D$ ,  $Z$  is  $Z$  score,  $P_{BY}$  is the probability of the  $Z$  score adjusted to account for multiple testing using the method of (57),  $nABBA$  and  $nBABA$  are the number of ABBA and BABA patterns respectively, Bl is the number of 5 Mb blocks,  $H^*$  are the names of the four populations in the specific tree with  $H_4$  as the outgroup ( $((H_1, H_2), H_3), H_4$ ). The taxa are Atlantic cod, Walleye Pollock, Greenland cod, Pacific cod, Arctic cod, and Polar cod as the outgroup in accordance with the mtDNA tree (Fig. 2). Based on high coverage data using the ANGSD multi population ABBA-BABA test (`-doAbbababa2 1`).  $D$  is the standardized difference  $D = nABBA - nBABA$ . A negative value of  $D$  means that  $H_1$  is closer to  $H_3$  than  $H_2$  is. A positive value of  $D$  means that  $H_2$  is closer to  $H_3$  than  $H_1$  is. Based on transversions with transitions removed.

|  | $D$   | JK $D$ | VJK $D$ | $Z$     | $P_{BY}$ | $nABBA$ | $nBABA$ | Bl  | $H_1$     | $H_2$     | $H_3$     | $H_4$ |
|--|-------|--------|---------|---------|----------|---------|---------|-----|-----------|-----------|-----------|-------|
|  | 0.21  | 0.21   | 0.0000  | 55.66   | 0.000    | 60553   | 39873   | 131 | Atlantic  | Walleye   | Pacific   | Polar |
|  | 0.19  | 0.19   | 0.0000  | 53.55   | 0.000    | 59512   | 40171   | 131 | Atlantic  | Walleye   | Greenland | Polar |
|  | 0.18  | 0.18   | 0.0000  | 46.25   | 0.000    | 46338   | 32168   | 131 | Atlantic  | Walleye   | Arctic    | Polar |
|  | -0.42 | -0.42  | 0.0001  | -42.49  | 0.000    | 60553   | 147944  | 131 | Atlantic  | Pacific   | Walleye   | Polar |
|  | 0.94  | 0.94   | 0.0000  | 422.05  | 0.000    | 456701  | 15065   | 131 | Atlantic  | Pacific   | Greenland | Polar |
|  | 0.19  | 0.19   | 0.0000  | 46.27   | 0.000    | 65686   | 45170   | 131 | Atlantic  | Pacific   | Arctic    | Polar |
|  | -0.42 | -0.42  | 0.0001  | -42.19  | 0.000    | 59512   | 146033  | 131 | Atlantic  | Greenland | Walleye   | Polar |
|  | 0.94  | 0.94   | 0.0000  | 421.42  | 0.000    | 456701  | 13716   | 131 | Atlantic  | Greenland | Pacific   | Polar |
|  | 0.19  | 0.19   | 0.0000  | 47.31   | 0.000    | 64852   | 44217   | 131 | Atlantic  | Greenland | Arctic    | Polar |
|  | -0.73 | -0.73  | 0.0000  | -123.97 | 0.000    | 46338   | 291864  | 131 | Atlantic  | Arctic    | Walleye   | Polar |
|  | -0.50 | -0.50  | 0.0001  | -70.02  | 0.000    | 65686   | 199157  | 131 | Atlantic  | Arctic    | Pacific   | Polar |
|  | -0.51 | -0.51  | 0.0001  | -71.22  | 0.000    | 64852   | 199538  | 131 | Atlantic  | Arctic    | Greenland | Polar |
|  | -0.58 | -0.58  | 0.0001  | -73.62  | 0.000    | 39873   | 147944  | 131 | Walleye   | Pacific   | Atlantic  | Polar |
|  | 0.93  | 0.93   | 0.0000  | 358.19  | 0.000    | 429131  | 14774   | 131 | Walleye   | Pacific   | Greenland | Polar |
|  | 0.06  | 0.06   | 0.0000  | 17.31   | 0.000    | 53704   | 47394   | 131 | Walleye   | Pacific   | Arctic    | Polar |
|  | -0.57 | -0.57  | 0.0001  | -73.31  | 0.000    | 40171   | 146033  | 131 | Walleye   | Greenland | Atlantic  | Polar |
|  | 0.94  | 0.94   | 0.0000  | 362.58  | 0.000    | 429131  | 14396   | 131 | Walleye   | Greenland | Pacific   | Polar |
|  | 0.07  | 0.07   | 0.0000  | 17.48   | 0.000    | 53193   | 46593   | 131 | Walleye   | Greenland | Arctic    | Polar |
|  | -0.80 | -0.80  | 0.0000  | -161.67 | 0.000    | 32168   | 291864  | 131 | Walleye   | Arctic    | Atlantic  | Polar |
|  | -0.58 | -0.58  | 0.0000  | -92.42  | 0.000    | 53704   | 204504  | 131 | Walleye   | Arctic    | Pacific   | Polar |
|  | -0.59 | -0.59  | 0.0000  | -93.06  | 0.000    | 53193   | 203908  | 131 | Walleye   | Arctic    | Greenland | Polar |
|  | 0.05  | 0.05   | 0.0000  | 10.31   | 0.000    | 15065   | 13716   | 131 | Pacific   | Greenland | Atlantic  | Polar |
|  | 0.01  | 0.01   | 0.0000  | 2.96    | 0.013    | 14774   | 14396   | 131 | Pacific   | Greenland | Walleye   | Polar |
|  | 0.01  | 0.01   | 0.0000  | 1.09    | 1.000    | 12217   | 12084   | 131 | Pacific   | Greenland | Arctic    | Polar |
|  | -0.63 | -0.63  | 0.0000  | -97.00  | 0.000    | 45170   | 199157  | 131 | Pacific   | Arctic    | Atlantic  | Polar |
|  | -0.62 | -0.62  | 0.0000  | -100.18 | 0.000    | 47394   | 204504  | 131 | Pacific   | Arctic    | Walleye   | Polar |
|  | -0.96 | -0.96  | 0.0000  | -587.45 | 0.000    | 12217   | 561269  | 131 | Pacific   | Arctic    | Greenland | Polar |
|  | -0.64 | -0.64  | 0.0000  | -98.31  | 0.000    | 44217   | 199538  | 131 | Greenland | Arctic    | Atlantic  | Polar |
|  | -0.63 | -0.63  | 0.0000  | -100.10 | 0.000    | 46593   | 203908  | 131 | Greenland | Arctic    | Walleye   | Polar |
|  | -0.96 | -0.96  | 0.0000  | -601.77 | 0.000    | 12084   | 561269  | 131 | Greenland | Arctic    | Pacific   | Polar |

All linkage groups combined

**Table S3. ABBA-BABA  $D$  test for each linkage group of six gadid species with Arctic cod as the root.**  $D$  is the ABBA-BABA four-taxon test statistic,  $JK D$  is the jackknife estimate of  $D$ ,  $VJK D$  is the variance of the  $JK D$ ,  $Z$  is  $Z$  score,  $P_{BY}$  is the probability of the  $Z$  score adjusted to account for multiple testing using the method of (57),  $nABBA$  and  $nBABA$  are the number of ABBA and BABA patterns respectively,  $Bl$  is the number of 5 Mb blocks,  $H^*$  are the names of the four populations in the specific tree with  $H_4$  as outgroup ( $(H_1, H_2), H_3, H_4$ ). The taxa are Atlantic cod, Walleye Pollock, Greenland cod, Pacific cod, Polar cod, and Arctic cod as outgroup. Based on high coverage data for all taxa but Polar cod which was low coverage using the ANGSD multi population ABBA-BABA test (`-doAbbababa2 1`).  $D$  is the standardized difference  $D = nABBA - nBABA$ . A negative value of  $D$  means that  $H_1$  is closer to  $H_3$  than  $H_2$  is. A positive value of  $D$  means that  $H_2$  is closer to  $H_3$  than  $H_1$  is. Based on transversions with transitions removed.

| $D$ | $JK D$ | $VJK D$ | $Z$ | $P_{BY}$ | $nABBA$ | $nBABA$ | $Bl$ | $H_1$ | $H_2$ | $H_3$ | $H_4$ |
|-----|--------|---------|-----|----------|---------|---------|------|-------|-------|-------|-------|
|-----|--------|---------|-----|----------|---------|---------|------|-------|-------|-------|-------|



Table S3. (continued)

|  | $D$   | $JK D$ | $VJK D$ | $Z$     | $P_{BY}$ | $nABBA$ | $nBABA$ | $BI$ | $H_1$     | $H_2$     | $H_3$     | $H_4$  |
|--|-------|--------|---------|---------|----------|---------|---------|------|-----------|-----------|-----------|--------|
|  | 0.05  | 0.05   | 0.0004  | 2.33    | 0.156    | 9601    | 8711    | 6    | Atlantic  | Walleye   | Pacific   | Arctic |
|  | 0.04  | 0.04   | 0.0004  | 1.83    | 0.516    | 9440    | 8762    | 6    | Atlantic  | Walleye   | Greenland | Arctic |
|  | -0.18 | -0.18  | 0.0001  | -16.69  | 0.000    | 1652    | 2390    | 6    | Atlantic  | Walleye   | Polar     | Arctic |
|  | -0.55 | -0.55  | 0.0027  | -10.59  | 0.000    | 9601    | 33232   | 6    | Atlantic  | Pacific   | Walleye   | Arctic |
|  | 0.92  | 0.92   | 0.0000  | 160.76  | 0.000    | 82006   | 3306    | 6    | Atlantic  | Pacific   | Greenland | Arctic |
|  | -0.20 | -0.20  | 0.0002  | -12.82  | 0.000    | 2275    | 3387    | 6    | Atlantic  | Pacific   | Polar     | Arctic |
|  | -0.55 | -0.55  | 0.0026  | -10.84  | 0.000    | 9440    | 32797   | 6    | Atlantic  | Greenland | Walleye   | Arctic |
|  | 0.93  | 0.93   | 0.0000  | 137.19  | 0.000    | 82006   | 3125    | 6    | Atlantic  | Greenland | Pacific   | Arctic |
|  | -0.20 | -0.20  | 0.0001  | -17.01  | 0.000    | 2222    | 3358    | 6    | Atlantic  | Greenland | Polar     | Arctic |
|  | -0.79 | -0.79  | 0.0005  | -35.08  | 0.000    | 1652    | 14286   | 6    | Atlantic  | Polar     | Walleye   | Arctic |
|  | -0.62 | -0.62  | 0.0007  | -23.13  | 0.000    | 2275    | 9668    | 6    | Atlantic  | Polar     | Pacific   | Arctic |
|  | -0.63 | -0.63  | 0.0008  | -22.58  | 0.000    | 2222    | 9648    | 6    | Atlantic  | Polar     | Greenland | Arctic |
|  | -0.58 | -0.58  | 0.0014  | -15.54  | 0.000    | 8711    | 33232   | 6    | Walleye   | Pacific   | Atlantic  | Arctic |
|  | 0.92  | 0.92   | 0.0000  | 141.55  | 0.000    | 79144   | 3084    | 6    | Walleye   | Pacific   | Greenland | Arctic |
|  | -0.08 | -0.08  | 0.0003  | -4.35   | 0.000    | 2427    | 2843    | 6    | Walleye   | Pacific   | Polar     | Arctic |
|  | -0.58 | -0.58  | 0.0014  | -15.43  | 0.000    | 8762    | 32797   | 6    | Walleye   | Greenland | Atlantic  | Arctic |
|  | 0.93  | 0.93   | 0.0001  | 120.44  | 0.000    | 79144   | 3011    | 6    | Walleye   | Greenland | Pacific   | Arctic |
|  | -0.08 | -0.08  | 0.0003  | -4.81   | 0.000    | 2400    | 2817    | 6    | Walleye   | Greenland | Polar     | Arctic |
|  | -0.71 | -0.71  | 0.0009  | -23.46  | 0.000    | 2390    | 14286   | 6    | Walleye   | Polar     | Atlantic  | Arctic |
|  | -0.61 | -0.61  | 0.0006  | -23.96  | 0.000    | 2427    | 9930    | 6    | Walleye   | Polar     | Pacific   | Arctic |
|  | -0.61 | -0.61  | 0.0007  | -23.08  | 0.000    | 2400    | 9877    | 6    | Walleye   | Polar     | Greenland | Arctic |
|  | 0.03  | 0.03   | 0.0002  | 2.07    | 0.295    | 3306    | 3125    | 6    | Pacific   | Greenland | Atlantic  | Arctic |
|  | 0.01  | 0.01   | 0.0001  | 1.03    | 1.000    | 3084    | 3011    | 6    | Pacific   | Greenland | Walleye   | Arctic |
|  | -0.01 | -0.01  | 0.0007  | -0.21   | 1.000    | 619     | 626     | 6    | Pacific   | Greenland | Polar     | Arctic |
|  | -0.48 | -0.48  | 0.0015  | -12.23  | 0.000    | 3387    | 9668    | 6    | Pacific   | Polar     | Atlantic  | Arctic |
|  | -0.55 | -0.55  | 0.0010  | -17.54  | 0.000    | 2843    | 9930    | 6    | Pacific   | Polar     | Walleye   | Arctic |
|  | -0.96 | -0.96  | 0.0000  | -162.13 | 0.000    | 619     | 27790   | 6    | Pacific   | Polar     | Greenland | Arctic |
|  | -0.48 | -0.48  | 0.0016  | -11.96  | 0.000    | 3358    | 9648    | 6    | Greenland | Polar     | Atlantic  | Arctic |
|  | -0.56 | -0.56  | 0.0011  | -16.84  | 0.000    | 2817    | 9877    | 6    | Greenland | Polar     | Walleye   | Arctic |
|  | -0.96 | -0.96  | 0.0000  | -144.34 | 0.000    | 626     | 27790   | 6    | Greenland | Polar     | Pacific   | Arctic |

LG01

Table S3. (continued)

|  | $D$   | $JK D$ | $VJK D$ | $Z$     | $P_{BY}$ | $nABBA$ | $nBABA$ | $BI$ | $H_1$     | $H_2$     | $H_3$     | $H_4$  |
|--|-------|--------|---------|---------|----------|---------|---------|------|-----------|-----------|-----------|--------|
|  | 0.09  | 0.09   | 0.0005  | 4.13    | 0.000    | 9437    | 7817    | 5    | Atlantic  | Walleye   | Pacific   | Arctic |
|  | 0.07  | 0.07   | 0.0006  | 3.04    | 0.019    | 9167    | 7902    | 5    | Atlantic  | Walleye   | Greenland | Arctic |
|  | -0.21 | -0.21  | 0.0003  | -11.76  | 0.000    | 1322    | 2015    | 5    | Atlantic  | Walleye   | Polar     | Arctic |
|  | -0.49 | -0.49  | 0.0038  | -8.06   | 0.000    | 9437    | 27849   | 5    | Atlantic  | Pacific   | Walleye   | Arctic |
|  | 0.92  | 0.92   | 0.0000  | 222.17  | 0.000    | 73238   | 3011    | 5    | Atlantic  | Pacific   | Greenland | Arctic |
|  | -0.21 | -0.21  | 0.0004  | -10.29  | 0.000    | 1780    | 2701    | 5    | Atlantic  | Pacific   | Polar     | Arctic |
|  | -0.50 | -0.50  | 0.0039  | -7.94   | 0.000    | 9167    | 27364   | 5    | Atlantic  | Greenland | Walleye   | Arctic |
|  | 0.93  | 0.93   | 0.0000  | 196.67  | 0.000    | 73238   | 2726    | 5    | Atlantic  | Greenland | Pacific   | Arctic |
|  | -0.21 | -0.21  | 0.0004  | -9.92   | 0.000    | 1753    | 2669    | 5    | Atlantic  | Greenland | Polar     | Arctic |
|  | -0.79 | -0.79  | 0.0004  | -37.82  | 0.000    | 1322    | 11209   | 5    | Atlantic  | Polar     | Walleye   | Arctic |
|  | -0.63 | -0.63  | 0.0009  | -20.87  | 0.000    | 1780    | 7905    | 5    | Atlantic  | Polar     | Pacific   | Arctic |
|  | -0.64 | -0.64  | 0.0009  | -21.29  | 0.000    | 1753    | 7926    | 5    | Atlantic  | Polar     | Greenland | Arctic |
|  | -0.56 | -0.56  | 0.0019  | -12.98  | 0.000    | 7817    | 27849   | 5    | Walleye   | Pacific   | Atlantic  | Arctic |
|  | 0.92  | 0.92   | 0.0000  | 173.50  | 0.000    | 69788   | 2753    | 5    | Walleye   | Pacific   | Greenland | Arctic |
|  | -0.05 | -0.05  | 0.0002  | -3.87   | 0.001    | 1868    | 2084    | 5    | Walleye   | Pacific   | Polar     | Arctic |
|  | -0.55 | -0.55  | 0.0020  | -12.33  | 0.000    | 7902    | 27364   | 5    | Walleye   | Greenland | Atlantic  | Arctic |
|  | 0.92  | 0.92   | 0.0000  | 163.58  | 0.000    | 69788   | 2722    | 5    | Walleye   | Greenland | Pacific   | Arctic |
|  | -0.06 | -0.06  | 0.0005  | -2.60   | 0.075    | 1847    | 2066    | 5    | Walleye   | Greenland | Polar     | Arctic |
|  | -0.70 | -0.70  | 0.0012  | -20.48  | 0.000    | 2015    | 11209   | 5    | Walleye   | Polar     | Atlantic  | Arctic |
|  | -0.63 | -0.63  | 0.0007  | -24.36  | 0.000    | 1868    | 8237    | 5    | Walleye   | Polar     | Pacific   | Arctic |
|  | -0.63 | -0.63  | 0.0007  | -23.70  | 0.000    | 1847    | 8226    | 5    | Walleye   | Polar     | Greenland | Arctic |
|  | 0.05  | 0.05   | 0.0002  | 3.22    | 0.011    | 3011    | 2726    | 5    | Pacific   | Greenland | Atlantic  | Arctic |
|  | 0.01  | 0.01   | 0.0002  | 0.38    | 1.000    | 2753    | 2722    | 5    | Pacific   | Greenland | Walleye   | Arctic |
|  | -0.01 | -0.01  | 0.0006  | -0.29   | 1.000    | 503     | 510     | 5    | Pacific   | Greenland | Polar     | Arctic |
|  | -0.49 | -0.49  | 0.0015  | -12.62  | 0.000    | 2701    | 7905    | 5    | Pacific   | Polar     | Atlantic  | Arctic |
|  | -0.60 | -0.60  | 0.0005  | -26.97  | 0.000    | 2084    | 8237    | 5    | Pacific   | Polar     | Walleye   | Arctic |
|  | -0.95 | -0.95  | 0.0000  | -387.68 | 0.000    | 503     | 21746   | 5    | Pacific   | Polar     | Greenland | Arctic |
|  | -0.50 | -0.50  | 0.0014  | -13.47  | 0.000    | 2669    | 7926    | 5    | Greenland | Polar     | Atlantic  | Arctic |
|  | -0.60 | -0.60  | 0.0005  | -26.90  | 0.000    | 2066    | 8226    | 5    | Greenland | Polar     | Walleye   | Arctic |
|  | -0.95 | -0.95  | 0.0000  | -328.24 | 0.000    | 510     | 21746   | 5    | Greenland | Polar     | Pacific   | Arctic |

LG02

Table S3. (continued)

|  | $D$   | $JK D$ | $VJK D$ | $Z$     | $P_{BY}$ | $nABBA$ | $nBABA$ | $BI$ | $H_1$     | $H_2$     | $H_3$     | $H_4$  |
|--|-------|--------|---------|---------|----------|---------|---------|------|-----------|-----------|-----------|--------|
|  | 0.06  | 0.06   | 0.0002  | 4.96    | 0.000    | 9285    | 8180    | 6    | Atlantic  | Walleye   | Pacific   | Arctic |
|  | 0.04  | 0.04   | 0.0002  | 3.01    | 0.021    | 9030    | 8279    | 6    | Atlantic  | Walleye   | Greenland | Arctic |
|  | -0.21 | -0.21  | 0.0002  | -13.24  | 0.000    | 1466    | 2233    | 6    | Atlantic  | Walleye   | Polar     | Arctic |
|  | -0.56 | -0.56  | 0.0012  | -16.48  | 0.000    | 9285    | 32985   | 6    | Atlantic  | Pacific   | Walleye   | Arctic |
|  | 0.92  | 0.92   | 0.0001  | 104.40  | 0.000    | 84129   | 3279    | 6    | Atlantic  | Pacific   | Greenland | Arctic |
|  | -0.20 | -0.20  | 0.0001  | -17.64  | 0.000    | 2078    | 3125    | 6    | Atlantic  | Pacific   | Polar     | Arctic |
|  | -0.56 | -0.56  | 0.0012  | -16.02  | 0.000    | 9030    | 32395   | 6    | Atlantic  | Greenland | Walleye   | Arctic |
|  | 0.93  | 0.93   | 0.0001  | 110.73  | 0.000    | 84129   | 2899    | 6    | Atlantic  | Greenland | Pacific   | Arctic |
|  | -0.21 | -0.21  | 0.0001  | -17.99  | 0.000    | 2002    | 3076    | 6    | Atlantic  | Greenland | Polar     | Arctic |
|  | -0.82 | -0.82  | 0.0005  | -36.27  | 0.000    | 1466    | 14705   | 6    | Atlantic  | Polar     | Walleye   | Arctic |
|  | -0.66 | -0.66  | 0.0011  | -19.81  | 0.000    | 2078    | 10314   | 6    | Atlantic  | Polar     | Pacific   | Arctic |
|  | -0.68 | -0.68  | 0.0011  | -19.94  | 0.000    | 2002    | 10342   | 6    | Atlantic  | Polar     | Greenland | Arctic |
|  | -0.60 | -0.60  | 0.0009  | -19.97  | 0.000    | 8180    | 32985   | 6    | Walleye   | Pacific   | Atlantic  | Arctic |
|  | 0.93  | 0.93   | 0.0001  | 97.53   | 0.000    | 80694   | 3002    | 6    | Walleye   | Pacific   | Greenland | Arctic |
|  | -0.06 | -0.06  | 0.0002  | -4.65   | 0.000    | 2177    | 2473    | 6    | Walleye   | Pacific   | Polar     | Arctic |
|  | -0.59 | -0.59  | 0.0009  | -19.91  | 0.000    | 8279    | 32395   | 6    | Walleye   | Greenland | Atlantic  | Arctic |
|  | 0.93  | 0.93   | 0.0001  | 107.86  | 0.000    | 80694   | 2894    | 6    | Walleye   | Greenland | Pacific   | Arctic |
|  | -0.08 | -0.08  | 0.0001  | -6.48   | 0.000    | 2122    | 2468    | 6    | Walleye   | Greenland | Polar     | Arctic |
|  | -0.74 | -0.74  | 0.0008  | -26.05  | 0.000    | 2233    | 14705   | 6    | Walleye   | Polar     | Atlantic  | Arctic |
|  | -0.66 | -0.66  | 0.0011  | -20.23  | 0.000    | 2177    | 10646   | 6    | Walleye   | Polar     | Pacific   | Arctic |
|  | -0.67 | -0.67  | 0.0011  | -20.18  | 0.000    | 2122    | 10604   | 6    | Walleye   | Polar     | Greenland | Arctic |
|  | 0.06  | 0.06   | 0.0002  | 4.44    | 0.000    | 3279    | 2899    | 6    | Pacific   | Greenland | Atlantic  | Arctic |
|  | 0.02  | 0.02   | 0.0000  | 2.71    | 0.054    | 3002    | 2894    | 6    | Pacific   | Greenland | Walleye   | Arctic |
|  | -0.01 | -0.01  | 0.0003  | -0.45   | 1.000    | 554     | 563     | 6    | Pacific   | Greenland | Polar     | Arctic |
|  | -0.53 | -0.53  | 0.0018  | -12.62  | 0.000    | 3125    | 10314   | 6    | Pacific   | Polar     | Atlantic  | Arctic |
|  | -0.62 | -0.62  | 0.0012  | -17.62  | 0.000    | 2473    | 10646   | 6    | Pacific   | Polar     | Walleye   | Arctic |
|  | -0.96 | -0.96  | 0.0000  | -196.84 | 0.000    | 554     | 27959   | 6    | Pacific   | Polar     | Greenland | Arctic |
|  | -0.54 | -0.54  | 0.0018  | -12.79  | 0.000    | 3076    | 10342   | 6    | Greenland | Polar     | Atlantic  | Arctic |
|  | -0.62 | -0.62  | 0.0013  | -17.43  | 0.000    | 2468    | 10604   | 6    | Greenland | Polar     | Walleye   | Arctic |
|  | -0.96 | -0.96  | 0.0000  | -206.52 | 0.000    | 563     | 27959   | 6    | Greenland | Polar     | Pacific   | Arctic |

LG03

Table S3. (continued)

|      | $D$   | $JK D$ | $VJK D$ | $Z$    | $P_{BY}$ | $nABBA$ | $nBABA$ | $BI$ | $H_1$     | $H_2$     | $H_3$     | $H_4$  |
|------|-------|--------|---------|--------|----------|---------|---------|------|-----------|-----------|-----------|--------|
|      | 0.11  | 0.11   | 0.0005  | 5.04   | 0.000    | 15779   | 12690   | 7    | Atlantic  | Walleye   | Pacific   | Arctic |
|      | 0.09  | 0.09   | 0.0004  | 4.54   | 0.000    | 15336   | 12686   | 7    | Atlantic  | Walleye   | Greenland | Arctic |
|      | -0.19 | -0.19  | 0.0004  | -8.83  | 0.000    | 1799    | 2620    | 7    | Atlantic  | Walleye   | Polar     | Arctic |
|      | -0.43 | -0.43  | 0.0033  | -7.44  | 0.000    | 15779   | 39433   | 7    | Atlantic  | Pacific   | Walleye   | Arctic |
|      | 0.90  | 0.90   | 0.0001  | 126.38 | 0.000    | 105352  | 5273    | 7    | Atlantic  | Pacific   | Greenland | Arctic |
|      | -0.18 | -0.18  | 0.0004  | -8.96  | 0.000    | 2332    | 3362    | 7    | Atlantic  | Pacific   | Polar     | Arctic |
|      | -0.43 | -0.43  | 0.0033  | -7.49  | 0.000    | 15336   | 38549   | 7    | Atlantic  | Greenland | Walleye   | Arctic |
|      | 0.91  | 0.91   | 0.0000  | 131.15 | 0.000    | 105352  | 4909    | 7    | Atlantic  | Greenland | Pacific   | Arctic |
|      | -0.18 | -0.18  | 0.0004  | -8.81  | 0.000    | 2292    | 3298    | 7    | Atlantic  | Greenland | Polar     | Arctic |
|      | -0.74 | -0.74  | 0.0015  | -19.42 | 0.000    | 1799    | 12208   | 7    | Atlantic  | Polar     | Walleye   | Arctic |
|      | -0.58 | -0.58  | 0.0015  | -15.13 | 0.000    | 2332    | 8736    | 7    | Atlantic  | Polar     | Pacific   | Arctic |
|      | -0.58 | -0.58  | 0.0015  | -15.05 | 0.000    | 2292    | 8719    | 7    | Atlantic  | Polar     | Greenland | Arctic |
|      | -0.51 | -0.51  | 0.0018  | -11.95 | 0.000    | 12690   | 39433   | 7    | Walleye   | Pacific   | Atlantic  | Arctic |
|      | 0.90  | 0.90   | 0.0001  | 102.91 | 0.000    | 99413   | 5062    | 7    | Walleye   | Pacific   | Greenland | Arctic |
| LG04 | -0.04 | -0.04  | 0.0002  | -3.07  | 0.017    | 2461    | 2655    | 7    | Walleye   | Pacific   | Polar     | Arctic |
|      | -0.50 | -0.50  | 0.0019  | -11.66 | 0.000    | 12686   | 38549   | 7    | Walleye   | Greenland | Atlantic  | Arctic |
|      | 0.90  | 0.90   | 0.0001  | 105.32 | 0.000    | 99413   | 4981    | 7    | Walleye   | Greenland | Pacific   | Arctic |
|      | -0.04 | -0.04  | 0.0001  | -3.06  | 0.018    | 2429    | 2606    | 7    | Walleye   | Greenland | Polar     | Arctic |
|      | -0.65 | -0.65  | 0.0023  | -13.45 | 0.000    | 2620    | 12208   | 7    | Walleye   | Polar     | Atlantic  | Arctic |
|      | -0.58 | -0.58  | 0.0010  | -18.18 | 0.000    | 2461    | 9245    | 7    | Walleye   | Polar     | Pacific   | Arctic |
|      | -0.58 | -0.58  | 0.0011  | -17.90 | 0.000    | 2429    | 9206    | 7    | Walleye   | Polar     | Greenland | Arctic |
|      | 0.04  | 0.04   | 0.0000  | 5.98   | 0.000    | 5273    | 4909    | 7    | Pacific   | Greenland | Atlantic  | Arctic |
|      | 0.01  | 0.01   | 0.0001  | 0.93   | 1.000    | 5062    | 4981    | 7    | Pacific   | Greenland | Walleye   | Arctic |
|      | 0.01  | 0.01   | 0.0006  | 0.47   | 1.000    | 879     | 860     | 7    | Pacific   | Greenland | Polar     | Arctic |
|      | -0.44 | -0.44  | 0.0022  | -9.56  | 0.000    | 3362    | 8736    | 7    | Pacific   | Polar     | Atlantic  | Arctic |
|      | -0.55 | -0.55  | 0.0010  | -17.34 | 0.000    | 2655    | 9245    | 7    | Pacific   | Polar     | Walleye   | Arctic |
|      | -0.93 | -0.93  | 0.0001  | -77.30 | 0.000    | 879     | 24212   | 7    | Pacific   | Polar     | Greenland | Arctic |
|      | -0.45 | -0.45  | 0.0022  | -9.54  | 0.000    | 3298    | 8719    | 7    | Greenland | Polar     | Atlantic  | Arctic |
|      | -0.56 | -0.56  | 0.0011  | -17.16 | 0.000    | 2606    | 9206    | 7    | Greenland | Polar     | Walleye   | Arctic |
|      | -0.93 | -0.93  | 0.0002  | -75.17 | 0.000    | 860     | 24212   | 7    | Greenland | Polar     | Pacific   | Arctic |

Table S3. (continued)

|      | $D$   | JK $D$ | V.JK $D$ | $Z$     | $P_{BY}$ | $nABBA$ | $nBABA$ | BI | $H_1$     | $H_2$     | $H_3$     | $H_4$  |
|------|-------|--------|----------|---------|----------|---------|---------|----|-----------|-----------|-----------|--------|
|      | 0.06  | 0.06   | 0.0001   | 6.50    | 0.000    | 8207    | 7280    | 5  | Atlantic  | Walleye   | Pacific   | Arctic |
|      | 0.05  | 0.05   | 0.0001   | 4.44    | 0.000    | 8072    | 7362    | 5  | Atlantic  | Walleye   | Greenland | Arctic |
|      | -0.16 | -0.16  | 0.0000   | -23.67  | 0.000    | 1356    | 1881    | 5  | Atlantic  | Walleye   | Polar     | Arctic |
|      | -0.56 | -0.56  | 0.0020   | -12.35  | 0.000    | 8207    | 28712   | 5  | Atlantic  | Pacific   | Walleye   | Arctic |
|      | 0.92  | 0.92   | 0.0001   | 92.63   | 0.000    | 70392   | 2933    | 5  | Atlantic  | Pacific   | Greenland | Arctic |
|      | -0.17 | -0.17  | 0.0001   | -16.95  | 0.000    | 1936    | 2753    | 5  | Atlantic  | Pacific   | Polar     | Arctic |
|      | -0.56 | -0.56  | 0.0022   | -11.82  | 0.000    | 8072    | 28219   | 5  | Atlantic  | Greenland | Walleye   | Arctic |
|      | 0.93  | 0.93   | 0.0001   | 95.17   | 0.000    | 70392   | 2598    | 5  | Atlantic  | Greenland | Pacific   | Arctic |
|      | -0.18 | -0.18  | 0.0002   | -13.60  | 0.000    | 1897    | 2707    | 5  | Atlantic  | Greenland | Polar     | Arctic |
|      | -0.80 | -0.80  | 0.0007   | -31.44  | 0.000    | 1356    | 12356   | 5  | Atlantic  | Polar     | Walleye   | Arctic |
|      | -0.63 | -0.63  | 0.0004   | -32.92  | 0.000    | 1936    | 8402    | 5  | Atlantic  | Polar     | Pacific   | Arctic |
|      | -0.63 | -0.63  | 0.0004   | -30.87  | 0.000    | 1897    | 8440    | 5  | Atlantic  | Polar     | Greenland | Arctic |
|      | -0.60 | -0.60  | 0.0021   | -13.04  | 0.000    | 7280    | 28712   | 5  | Walleye   | Pacific   | Atlantic  | Arctic |
|      | 0.92  | 0.92   | 0.0001   | 86.02   | 0.000    | 67869   | 2697    | 5  | Walleye   | Pacific   | Greenland | Arctic |
| LG05 | -0.06 | -0.06  | 0.0001   | -5.65   | 0.000    | 2019    | 2283    | 5  | Walleye   | Pacific   | Polar     | Arctic |
|      | -0.59 | -0.59  | 0.0020   | -13.01  | 0.000    | 7362    | 28219   | 5  | Walleye   | Greenland | Atlantic  | Arctic |
|      | 0.93  | 0.93   | 0.0001   | 93.43   | 0.000    | 67869   | 2560    | 5  | Walleye   | Greenland | Pacific   | Arctic |
|      | -0.06 | -0.06  | 0.0001   | -5.42   | 0.000    | 1977    | 2240    | 5  | Walleye   | Greenland | Polar     | Arctic |
|      | -0.74 | -0.74  | 0.0010   | -23.44  | 0.000    | 1881    | 12356   | 5  | Walleye   | Polar     | Atlantic  | Arctic |
|      | -0.62 | -0.62  | 0.0005   | -26.73  | 0.000    | 2019    | 8610    | 5  | Walleye   | Polar     | Pacific   | Arctic |
|      | -0.63 | -0.63  | 0.0005   | -27.67  | 0.000    | 1977    | 8609    | 5  | Walleye   | Polar     | Greenland | Arctic |
|      | 0.06  | 0.06   | 0.0001   | 8.23    | 0.000    | 2933    | 2598    | 5  | Pacific   | Greenland | Atlantic  | Arctic |
|      | 0.03  | 0.03   | 0.0001   | 3.56    | 0.003    | 2697    | 2560    | 5  | Pacific   | Greenland | Walleye   | Arctic |
|      | 0.02  | 0.02   | 0.0003   | 1.51    | 0.985    | 525     | 501     | 5  | Pacific   | Greenland | Polar     | Arctic |
|      | -0.51 | -0.51  | 0.0009   | -16.81  | 0.000    | 2753    | 8402    | 5  | Pacific   | Polar     | Atlantic  | Arctic |
|      | -0.58 | -0.58  | 0.0009   | -19.64  | 0.000    | 2283    | 8610    | 5  | Pacific   | Polar     | Walleye   | Arctic |
|      | -0.96 | -0.96  | 0.0001   | -129.33 | 0.000    | 525     | 23206   | 5  | Pacific   | Polar     | Greenland | Arctic |
|      | -0.51 | -0.51  | 0.0009   | -16.92  | 0.000    | 2707    | 8440    | 5  | Greenland | Polar     | Atlantic  | Arctic |
|      | -0.59 | -0.59  | 0.0009   | -19.92  | 0.000    | 2240    | 8609    | 5  | Greenland | Polar     | Walleye   | Arctic |
|      | -0.96 | -0.96  | 0.0000   | -150.13 | 0.000    | 501     | 23206   | 5  | Greenland | Polar     | Pacific   | Arctic |

Table S3. (continued)

|  | $D$   | $JK D$ | $VJK D$ | $Z$     | $P_{BY}$ | $nABBA$ | $nBABA$ | $BI$ | $H_1$     | $H_2$     | $H_3$     | $H_4$  |
|--|-------|--------|---------|---------|----------|---------|---------|------|-----------|-----------|-----------|--------|
|  | 0.02  | 0.02   | 0.0001  | 1.75    | 0.605    | 6862    | 6575    | 6    | Atlantic  | Walleye   | Pacific   | Arctic |
|  | 0.00  | 0.00   | 0.0003  | 0.18    | 1.000    | 6704    | 6661    | 6    | Atlantic  | Walleye   | Greenland | Arctic |
|  | -0.18 | -0.18  | 0.0003  | -11.08  | 0.000    | 1257    | 1821    | 6    | Atlantic  | Walleye   | Polar     | Arctic |
|  | -0.65 | -0.65  | 0.0038  | -10.57  | 0.000    | 6862    | 32330   | 6    | Atlantic  | Pacific   | Walleye   | Arctic |
|  | 0.92  | 0.92   | 0.0002  | 71.94   | 0.000    | 73694   | 2965    | 6    | Atlantic  | Pacific   | Greenland | Arctic |
|  | -0.18 | -0.18  | 0.0005  | -7.89   | 0.000    | 1815    | 2599    | 6    | Atlantic  | Pacific   | Polar     | Arctic |
|  | -0.65 | -0.65  | 0.0037  | -10.67  | 0.000    | 6704    | 31834   | 6    | Atlantic  | Greenland | Walleye   | Arctic |
|  | 0.93  | 0.93   | 0.0002  | 66.64   | 0.000    | 73694   | 2634    | 6    | Atlantic  | Greenland | Pacific   | Arctic |
|  | -0.19 | -0.19  | 0.0005  | -8.61   | 0.000    | 1760    | 2566    | 6    | Atlantic  | Greenland | Polar     | Arctic |
|  | -0.84 | -0.84  | 0.0004  | -42.18  | 0.000    | 1257    | 14755   | 6    | Atlantic  | Polar     | Walleye   | Arctic |
|  | -0.69 | -0.69  | 0.0005  | -29.59  | 0.000    | 1815    | 9840    | 6    | Atlantic  | Polar     | Pacific   | Arctic |
|  | -0.70 | -0.70  | 0.0005  | -31.39  | 0.000    | 1760    | 9835    | 6    | Atlantic  | Polar     | Greenland | Arctic |
|  | -0.66 | -0.66  | 0.0030  | -12.15  | 0.000    | 6575    | 32330   | 6    | Walleye   | Pacific   | Atlantic  | Arctic |
|  | 0.93  | 0.93   | 0.0002  | 69.29   | 0.000    | 71769   | 2654    | 6    | Walleye   | Pacific   | Greenland | Arctic |
|  | -0.05 | -0.05  | 0.0003  | -2.90   | 0.029    | 1916    | 2130    | 6    | Walleye   | Pacific   | Polar     | Arctic |
|  | -0.65 | -0.65  | 0.0027  | -12.62  | 0.000    | 6661    | 31834   | 6    | Walleye   | Greenland | Atlantic  | Arctic |
|  | 0.93  | 0.93   | 0.0002  | 64.17   | 0.000    | 71769   | 2559    | 6    | Walleye   | Greenland | Pacific   | Arctic |
|  | -0.07 | -0.07  | 0.0002  | -4.57   | 0.000    | 1846    | 2105    | 6    | Walleye   | Greenland | Polar     | Arctic |
|  | -0.78 | -0.78  | 0.0006  | -31.53  | 0.000    | 1821    | 14755   | 6    | Walleye   | Polar     | Atlantic  | Arctic |
|  | -0.68 | -0.68  | 0.0006  | -27.45  | 0.000    | 1916    | 9889    | 6    | Walleye   | Polar     | Pacific   | Arctic |
|  | -0.68 | -0.68  | 0.0004  | -32.43  | 0.000    | 1846    | 9863    | 6    | Walleye   | Polar     | Greenland | Arctic |
|  | 0.06  | 0.06   | 0.0005  | 2.79    | 0.042    | 2965    | 2634    | 6    | Pacific   | Greenland | Atlantic  | Arctic |
|  | 0.02  | 0.02   | 0.0003  | 1.14    | 1.000    | 2654    | 2559    | 6    | Pacific   | Greenland | Walleye   | Arctic |
|  | -0.03 | -0.03  | 0.0005  | -1.47   | 1.000    | 481     | 514     | 6    | Pacific   | Greenland | Polar     | Arctic |
|  | -0.58 | -0.58  | 0.0004  | -28.60  | 0.000    | 2599    | 9840    | 6    | Pacific   | Polar     | Atlantic  | Arctic |
|  | -0.65 | -0.65  | 0.0004  | -33.39  | 0.000    | 2130    | 9889    | 6    | Pacific   | Polar     | Walleye   | Arctic |
|  | -0.96 | -0.96  | 0.0000  | -147.72 | 0.000    | 481     | 26271   | 6    | Pacific   | Polar     | Greenland | Arctic |
|  | -0.59 | -0.59  | 0.0004  | -27.73  | 0.000    | 2566    | 9835    | 6    | Greenland | Polar     | Atlantic  | Arctic |
|  | -0.65 | -0.65  | 0.0004  | -34.37  | 0.000    | 2105    | 9863    | 6    | Greenland | Polar     | Walleye   | Arctic |
|  | -0.96 | -0.96  | 0.0001  | -117.83 | 0.000    | 514     | 26271   | 6    | Greenland | Polar     | Pacific   | Arctic |

LG06

Table S3. (continued)

|  | $D$   | $JK D$ | $VJK D$ | $Z$    | $P_{BY}$ | $nABBA$ | $nBABA$ | $BI$ | $H_1$     | $H_2$     | $H_3$     | $H_4$  |
|--|-------|--------|---------|--------|----------|---------|---------|------|-----------|-----------|-----------|--------|
|  | 0.06  | 0.06   | 0.0001  | 6.75   | 0.000    | 11101   | 9895    | 7    | Atlantic  | Walleye   | Pacific   | Arctic |
|  | 0.04  | 0.04   | 0.0001  | 5.24   | 0.000    | 10865   | 9995    | 7    | Atlantic  | Walleye   | Greenland | Arctic |
|  | -0.15 | -0.15  | 0.0003  | -8.73  | 0.000    | 1704    | 2293    | 7    | Atlantic  | Walleye   | Polar     | Arctic |
|  | -0.51 | -0.51  | 0.0014  | -13.81 | 0.000    | 11101   | 34145   | 7    | Atlantic  | Pacific   | Walleye   | Arctic |
|  | 0.91  | 0.91   | 0.0003  | 54.15  | 0.000    | 90081   | 4111    | 7    | Atlantic  | Pacific   | Greenland | Arctic |
|  | -0.19 | -0.19  | 0.0005  | -8.40  | 0.000    | 2172    | 3197    | 7    | Atlantic  | Pacific   | Polar     | Arctic |
|  | -0.51 | -0.51  | 0.0014  | -13.90 | 0.000    | 10865   | 33557   | 7    | Atlantic  | Greenland | Walleye   | Arctic |
|  | 0.92  | 0.92   | 0.0003  | 55.24  | 0.000    | 90081   | 3714    | 7    | Atlantic  | Greenland | Pacific   | Arctic |
|  | -0.20 | -0.20  | 0.0004  | -10.30 | 0.000    | 2138    | 3181    | 7    | Atlantic  | Greenland | Polar     | Arctic |
|  | -0.77 | -0.77  | 0.0009  | -25.99 | 0.000    | 1704    | 13382   | 7    | Atlantic  | Polar     | Walleye   | Arctic |
|  | -0.62 | -0.62  | 0.0015  | -15.92 | 0.000    | 2172    | 9397    | 7    | Atlantic  | Polar     | Pacific   | Arctic |
|  | -0.63 | -0.63  | 0.0014  | -17.01 | 0.000    | 2138    | 9434    | 7    | Atlantic  | Polar     | Greenland | Arctic |
|  | -0.55 | -0.55  | 0.0014  | -14.82 | 0.000    | 9895    | 34145   | 7    | Walleye   | Pacific   | Atlantic  | Arctic |
|  | 0.92  | 0.92   | 0.0003  | 52.63  | 0.000    | 86646   | 3828    | 7    | Walleye   | Pacific   | Greenland | Arctic |
|  | -0.08 | -0.08  | 0.0002  | -5.03  | 0.000    | 2284    | 2675    | 7    | Walleye   | Pacific   | Polar     | Arctic |
|  | -0.54 | -0.54  | 0.0015  | -14.16 | 0.000    | 9995    | 33557   | 7    | Walleye   | Greenland | Atlantic  | Arctic |
|  | 0.92  | 0.92   | 0.0003  | 51.44  | 0.000    | 86646   | 3719    | 7    | Walleye   | Greenland | Pacific   | Arctic |
|  | -0.08 | -0.08  | 0.0002  | -6.62  | 0.000    | 2264    | 2678    | 7    | Walleye   | Greenland | Polar     | Arctic |
|  | -0.71 | -0.71  | 0.0009  | -24.16 | 0.000    | 2293    | 13382   | 7    | Walleye   | Polar     | Atlantic  | Arctic |
|  | -0.62 | -0.62  | 0.0016  | -15.63 | 0.000    | 2284    | 9670    | 7    | Walleye   | Polar     | Pacific   | Arctic |
|  | -0.62 | -0.62  | 0.0014  | -16.36 | 0.000    | 2264    | 9685    | 7    | Walleye   | Polar     | Greenland | Arctic |
|  | 0.05  | 0.05   | 0.0002  | 4.07   | 0.000    | 4111    | 3714    | 7    | Pacific   | Greenland | Atlantic  | Arctic |
|  | 0.01  | 0.01   | 0.0001  | 1.67   | 0.728    | 3828    | 3719    | 7    | Pacific   | Greenland | Walleye   | Arctic |
|  | -0.01 | -0.01  | 0.0004  | -0.38  | 1.000    | 651     | 660     | 7    | Pacific   | Greenland | Polar     | Arctic |
|  | -0.49 | -0.49  | 0.0011  | -15.01 | 0.000    | 3197    | 9397    | 7    | Pacific   | Polar     | Atlantic  | Arctic |
|  | -0.57 | -0.57  | 0.0013  | -16.00 | 0.000    | 2675    | 9670    | 7    | Pacific   | Polar     | Walleye   | Arctic |
|  | -0.95 | -0.95  | 0.0002  | -63.04 | 0.000    | 651     | 26637   | 7    | Pacific   | Polar     | Greenland | Arctic |
|  | -0.50 | -0.50  | 0.0011  | -14.89 | 0.000    | 3181    | 9434    | 7    | Greenland | Polar     | Atlantic  | Arctic |
|  | -0.57 | -0.57  | 0.0013  | -15.89 | 0.000    | 2678    | 9685    | 7    | Greenland | Polar     | Walleye   | Arctic |
|  | -0.95 | -0.95  | 0.0003  | -58.36 | 0.000    | 660     | 26637   | 7    | Greenland | Polar     | Pacific   | Arctic |

LG07

Table S3. (continued)

|  | $D$   | $JK D$ | $VJK D$ | $Z$     | $P_{BY}$ | $nABBA$ | $nBABA$ | $BI$ | $H_1$     | $H_2$     | $H_3$     | $H_4$  |
|--|-------|--------|---------|---------|----------|---------|---------|------|-----------|-----------|-----------|--------|
|  | 0.05  | 0.05   | 0.0001  | 5.47    | 0.000    | 8517    | 7635    | 6    | Atlantic  | Walleye   | Pacific   | Arctic |
|  | 0.04  | 0.04   | 0.0002  | 3.09    | 0.016    | 8315    | 7690    | 6    | Atlantic  | Walleye   | Greenland | Arctic |
|  | -0.16 | -0.16  | 0.0001  | -21.03  | 0.000    | 1426    | 1971    | 6    | Atlantic  | Walleye   | Polar     | Arctic |
|  | -0.59 | -0.59  | 0.0015  | -15.46  | 0.000    | 8517    | 33493   | 6    | Atlantic  | Pacific   | Walleye   | Arctic |
|  | 0.92  | 0.92   | 0.0002  | 64.76   | 0.000    | 76421   | 3323    | 6    | Atlantic  | Pacific   | Greenland | Arctic |
|  | -0.19 | -0.19  | 0.0004  | -8.90   | 0.000    | 1973    | 2883    | 6    | Atlantic  | Pacific   | Polar     | Arctic |
|  | -0.60 | -0.60  | 0.0016  | -14.78  | 0.000    | 8315    | 32856   | 6    | Atlantic  | Greenland | Walleye   | Arctic |
|  | 0.93  | 0.93   | 0.0002  | 69.51   | 0.000    | 76421   | 2947    | 6    | Atlantic  | Greenland | Pacific   | Arctic |
|  | -0.20 | -0.20  | 0.0007  | -7.69   | 0.000    | 1900    | 2842    | 6    | Atlantic  | Greenland | Polar     | Arctic |
|  | -0.79 | -0.79  | 0.0003  | -42.81  | 0.000    | 1426    | 12047   | 6    | Atlantic  | Polar     | Walleye   | Arctic |
|  | -0.60 | -0.60  | 0.0007  | -22.76  | 0.000    | 1973    | 7813    | 6    | Atlantic  | Polar     | Pacific   | Arctic |
|  | -0.61 | -0.61  | 0.0009  | -20.52  | 0.000    | 1900    | 7853    | 6    | Atlantic  | Polar     | Greenland | Arctic |
|  | -0.63 | -0.63  | 0.0011  | -18.55  | 0.000    | 7635    | 33493   | 6    | Walleye   | Pacific   | Atlantic  | Arctic |
|  | 0.92  | 0.92   | 0.0002  | 61.55   | 0.000    | 73770   | 3063    | 6    | Walleye   | Pacific   | Greenland | Arctic |
|  | -0.07 | -0.07  | 0.0005  | -3.38   | 0.006    | 2082    | 2411    | 6    | Walleye   | Pacific   | Polar     | Arctic |
|  | -0.62 | -0.62  | 0.0012  | -18.17  | 0.000    | 7690    | 32856   | 6    | Walleye   | Greenland | Atlantic  | Arctic |
|  | 0.92  | 0.92   | 0.0002  | 63.46   | 0.000    | 73770   | 2922    | 6    | Walleye   | Greenland | Pacific   | Arctic |
|  | -0.08 | -0.08  | 0.0008  | -2.82   | 0.038    | 2018    | 2376    | 6    | Walleye   | Greenland | Polar     | Arctic |
|  | -0.72 | -0.72  | 0.0005  | -33.70  | 0.000    | 1971    | 12047   | 6    | Walleye   | Polar     | Atlantic  | Arctic |
|  | -0.59 | -0.59  | 0.0007  | -22.58  | 0.000    | 2082    | 8073    | 6    | Walleye   | Polar     | Pacific   | Arctic |
|  | -0.60 | -0.60  | 0.0008  | -20.72  | 0.000    | 2018    | 8043    | 6    | Walleye   | Polar     | Greenland | Arctic |
|  | 0.06  | 0.06   | 0.0001  | 5.03    | 0.000    | 3323    | 2947    | 6    | Pacific   | Greenland | Atlantic  | Arctic |
|  | 0.02  | 0.02   | 0.0000  | 3.89    | 0.001    | 3063    | 2922    | 6    | Pacific   | Greenland | Walleye   | Arctic |
|  | -0.00 | -0.00  | 0.0015  | -0.07   | 1.000    | 539     | 542     | 6    | Pacific   | Greenland | Polar     | Arctic |
|  | -0.46 | -0.46  | 0.0006  | -19.33  | 0.000    | 2883    | 7813    | 6    | Pacific   | Polar     | Atlantic  | Arctic |
|  | -0.54 | -0.54  | 0.0004  | -28.14  | 0.000    | 2411    | 8073    | 6    | Pacific   | Polar     | Walleye   | Arctic |
|  | -0.95 | -0.95  | 0.0001  | -126.57 | 0.000    | 539     | 22830   | 6    | Pacific   | Polar     | Greenland | Arctic |
|  | -0.47 | -0.47  | 0.0006  | -19.57  | 0.000    | 2842    | 7853    | 6    | Greenland | Polar     | Atlantic  | Arctic |
|  | -0.54 | -0.54  | 0.0003  | -29.55  | 0.000    | 2376    | 8043    | 6    | Greenland | Polar     | Walleye   | Arctic |
|  | -0.95 | -0.95  | 0.0000  | -147.97 | 0.000    | 542     | 22830   | 6    | Greenland | Polar     | Pacific   | Arctic |

LG08



Table S3. (continued)

|      | $D$   | $JK D$ | $VJK D$ | $Z$     | $P_{BY}$ | $nABBA$ | $nBABA$ | $BI$ | $H_1$     | $H_2$     | $H_3$     | $H_4$  |
|------|-------|--------|---------|---------|----------|---------|---------|------|-----------|-----------|-----------|--------|
|      | 0.05  | 0.05   | 0.0001  | 4.55    | 0.000    | 7505    | 6724    | 6    | Atlantic  | Walleye   | Pacific   | Arctic |
|      | 0.04  | 0.04   | 0.0002  | 3.15    | 0.013    | 7354    | 6795    | 6    | Atlantic  | Walleye   | Greenland | Arctic |
|      | -0.18 | -0.18  | 0.0000  | -31.90  | 0.000    | 1455    | 2097    | 6    | Atlantic  | Walleye   | Polar     | Arctic |
|      | -0.64 | -0.64  | 0.0017  | -15.39  | 0.000    | 7505    | 34318   | 6    | Atlantic  | Pacific   | Walleye   | Arctic |
|      | 0.93  | 0.93   | 0.0000  | 205.63  | 0.000    | 76723   | 2684    | 6    | Atlantic  | Pacific   | Greenland | Arctic |
|      | -0.17 | -0.17  | 0.0002  | -10.92  | 0.000    | 2271    | 3214    | 6    | Atlantic  | Pacific   | Polar     | Arctic |
|      | -0.64 | -0.64  | 0.0017  | -15.34  | 0.000    | 7354    | 33657   | 6    | Atlantic  | Greenland | Walleye   | Arctic |
|      | 0.94  | 0.94   | 0.0000  | 260.92  | 0.000    | 76723   | 2324    | 6    | Atlantic  | Greenland | Pacific   | Arctic |
|      | -0.17 | -0.17  | 0.0003  | -10.30  | 0.000    | 2236    | 3173    | 6    | Atlantic  | Greenland | Polar     | Arctic |
|      | -0.81 | -0.81  | 0.0003  | -46.58  | 0.000    | 1455    | 13896   | 6    | Atlantic  | Polar     | Walleye   | Arctic |
|      | -0.59 | -0.59  | 0.0004  | -28.95  | 0.000    | 2271    | 8820    | 6    | Atlantic  | Polar     | Pacific   | Arctic |
|      | -0.60 | -0.60  | 0.0004  | -31.31  | 0.000    | 2236    | 8833    | 6    | Atlantic  | Polar     | Greenland | Arctic |
|      | -0.67 | -0.67  | 0.0011  | -19.85  | 0.000    | 6724    | 34318   | 6    | Walleye   | Pacific   | Atlantic  | Arctic |
|      | 0.94  | 0.94   | 0.0000  | 193.07  | 0.000    | 74451   | 2474    | 6    | Walleye   | Pacific   | Greenland | Arctic |
| LG09 | -0.06 | -0.06  | 0.0003  | -3.56   | 0.003    | 2343    | 2654    | 6    | Walleye   | Pacific   | Polar     | Arctic |
|      | -0.66 | -0.66  | 0.0012  | -19.12  | 0.000    | 6795    | 33657   | 6    | Walleye   | Greenland | Atlantic  | Arctic |
|      | 0.94  | 0.94   | 0.0000  | 213.42  | 0.000    | 74451   | 2246    | 6    | Walleye   | Greenland | Pacific   | Arctic |
|      | -0.06 | -0.06  | 0.0004  | -3.18   | 0.012    | 2317    | 2632    | 6    | Walleye   | Greenland | Polar     | Arctic |
|      | -0.74 | -0.74  | 0.0005  | -34.54  | 0.000    | 2097    | 13896   | 6    | Walleye   | Polar     | Atlantic  | Arctic |
|      | -0.59 | -0.59  | 0.0004  | -27.99  | 0.000    | 2343    | 9035    | 6    | Walleye   | Polar     | Pacific   | Arctic |
|      | -0.59 | -0.59  | 0.0004  | -29.83  | 0.000    | 2317    | 9028    | 6    | Walleye   | Polar     | Greenland | Arctic |
|      | 0.07  | 0.07   | 0.0001  | 6.01    | 0.000    | 2684    | 2324    | 6    | Pacific   | Greenland | Atlantic  | Arctic |
|      | 0.05  | 0.05   | 0.0001  | 4.75    | 0.000    | 2474    | 2246    | 6    | Pacific   | Greenland | Walleye   | Arctic |
|      | 0.02  | 0.02   | 0.0003  | 1.26    | 1.000    | 505     | 485     | 6    | Pacific   | Greenland | Polar     | Arctic |
|      | -0.47 | -0.47  | 0.0003  | -24.91  | 0.000    | 3214    | 8820    | 6    | Pacific   | Polar     | Atlantic  | Arctic |
|      | -0.55 | -0.55  | 0.0004  | -26.66  | 0.000    | 2654    | 9035    | 6    | Pacific   | Polar     | Walleye   | Arctic |
|      | -0.96 | -0.96  | 0.0000  | -276.76 | 0.000    | 505     | 26567   | 6    | Pacific   | Polar     | Greenland | Arctic |
|      | -0.47 | -0.47  | 0.0004  | -23.02  | 0.000    | 3173    | 8833    | 6    | Greenland | Polar     | Atlantic  | Arctic |
|      | -0.55 | -0.55  | 0.0004  | -25.89  | 0.000    | 2632    | 9028    | 6    | Greenland | Polar     | Walleye   | Arctic |
|      | -0.96 | -0.96  | 0.0000  | -295.56 | 0.000    | 485     | 26567   | 6    | Greenland | Polar     | Pacific   | Arctic |

Table S3. (continued)

|  | $D$   | $JK D$ | $VJK D$ | $Z$     | $P_{BY}$ | $nABBA$ | $nBABA$ | $BI$ | $H_1$     | $H_2$     | $H_3$     | $H_4$  |
|--|-------|--------|---------|---------|----------|---------|---------|------|-----------|-----------|-----------|--------|
|  | 0.05  | 0.05   | 0.0002  | 3.30    | 0.008    | 7520    | 6829    | 6    | Atlantic  | Walleye   | Pacific   | Arctic |
|  | 0.03  | 0.03   | 0.0002  | 1.95    | 0.393    | 7289    | 6866    | 6    | Atlantic  | Walleye   | Greenland | Arctic |
|  | -0.14 | -0.14  | 0.0007  | -5.30   | 0.000    | 1506    | 1984    | 6    | Atlantic  | Walleye   | Polar     | Arctic |
|  | -0.62 | -0.62  | 0.0004  | -32.70  | 0.000    | 7520    | 32285   | 6    | Atlantic  | Pacific   | Walleye   | Arctic |
|  | 0.92  | 0.92   | 0.0001  | 95.58   | 0.000    | 76767   | 3020    | 6    | Atlantic  | Pacific   | Greenland | Arctic |
|  | -0.17 | -0.17  | 0.0005  | -7.75   | 0.000    | 2140    | 3009    | 6    | Atlantic  | Pacific   | Polar     | Arctic |
|  | -0.63 | -0.63  | 0.0004  | -33.01  | 0.000    | 7289    | 31818   | 6    | Atlantic  | Greenland | Walleye   | Arctic |
|  | 0.93  | 0.93   | 0.0001  | 96.40   | 0.000    | 76767   | 2756    | 6    | Atlantic  | Greenland | Pacific   | Arctic |
|  | -0.18 | -0.18  | 0.0006  | -7.35   | 0.000    | 2085    | 2986    | 6    | Atlantic  | Greenland | Polar     | Arctic |
|  | -0.79 | -0.79  | 0.0003  | -49.65  | 0.000    | 1506    | 12993   | 6    | Atlantic  | Polar     | Walleye   | Arctic |
|  | -0.61 | -0.61  | 0.0005  | -27.58  | 0.000    | 2140    | 8712    | 6    | Atlantic  | Polar     | Pacific   | Arctic |
|  | -0.62 | -0.62  | 0.0005  | -28.81  | 0.000    | 2085    | 8764    | 6    | Atlantic  | Polar     | Greenland | Arctic |
|  | -0.65 | -0.65  | 0.0003  | -38.18  | 0.000    | 6829    | 32285   | 6    | Walleye   | Pacific   | Atlantic  | Arctic |
|  | 0.93  | 0.93   | 0.0001  | 92.26   | 0.000    | 74334   | 2774    | 6    | Walleye   | Pacific   | Greenland | Arctic |
|  | -0.09 | -0.09  | 0.0002  | -6.17   | 0.000    | 2151    | 2565    | 6    | Walleye   | Pacific   | Polar     | Arctic |
|  | -0.65 | -0.65  | 0.0003  | -40.44  | 0.000    | 6866    | 31818   | 6    | Walleye   | Greenland | Atlantic  | Arctic |
|  | 0.93  | 0.93   | 0.0001  | 89.06   | 0.000    | 74334   | 2715    | 6    | Walleye   | Greenland | Pacific   | Arctic |
|  | -0.10 | -0.10  | 0.0002  | -6.82   | 0.000    | 2104    | 2555    | 6    | Walleye   | Greenland | Polar     | Arctic |
|  | -0.74 | -0.74  | 0.0003  | -45.77  | 0.000    | 1984    | 12993   | 6    | Walleye   | Polar     | Atlantic  | Arctic |
|  | -0.61 | -0.61  | 0.0003  | -34.92  | 0.000    | 2151    | 8908    | 6    | Walleye   | Polar     | Pacific   | Arctic |
|  | -0.62 | -0.62  | 0.0003  | -37.39  | 0.000    | 2104    | 8880    | 6    | Walleye   | Polar     | Greenland | Arctic |
|  | 0.05  | 0.05   | 0.0001  | 4.60    | 0.000    | 3020    | 2756    | 6    | Pacific   | Greenland | Atlantic  | Arctic |
|  | 0.01  | 0.01   | 0.0000  | 1.92    | 0.424    | 2774    | 2715    | 6    | Pacific   | Greenland | Walleye   | Arctic |
|  | -0.03 | -0.03  | 0.0001  | -2.62   | 0.070    | 543     | 578     | 6    | Pacific   | Greenland | Polar     | Arctic |
|  | -0.49 | -0.49  | 0.0002  | -39.62  | 0.000    | 3009    | 8712    | 6    | Pacific   | Polar     | Atlantic  | Arctic |
|  | -0.55 | -0.55  | 0.0002  | -40.81  | 0.000    | 2565    | 8908    | 6    | Pacific   | Polar     | Walleye   | Arctic |
|  | -0.96 | -0.96  | 0.0001  | -107.06 | 0.000    | 543     | 25307   | 6    | Pacific   | Polar     | Greenland | Arctic |
|  | -0.49 | -0.49  | 0.0001  | -43.60  | 0.000    | 2986    | 8764    | 6    | Greenland | Polar     | Atlantic  | Arctic |
|  | -0.55 | -0.55  | 0.0002  | -41.08  | 0.000    | 2555    | 8880    | 6    | Greenland | Polar     | Walleye   | Arctic |
|  | -0.96 | -0.96  | 0.0001  | -111.18 | 0.000    | 578     | 25307   | 6    | Greenland | Polar     | Pacific   | Arctic |

LG10

Table S3. (continued)

|  | $D$   | $JK D$ | $VJK D$ | $Z$     | $P_{BY}$ | $nABBA$ | $nBABA$ | $BI$ | $H_1$     | $H_2$     | $H_3$     | $H_4$  |
|--|-------|--------|---------|---------|----------|---------|---------|------|-----------|-----------|-----------|--------|
|  | 0.03  | 0.03   | 0.0002  | 2.05    | 0.313    | 7865    | 7442    | 6    | Atlantic  | Walleye   | Pacific   | Arctic |
|  | 0.01  | 0.01   | 0.0003  | 0.39    | 1.000    | 7762    | 7653    | 6    | Atlantic  | Walleye   | Greenland | Arctic |
|  | -0.20 | -0.20  | 0.0004  | -10.00  | 0.000    | 1498    | 2251    | 6    | Atlantic  | Walleye   | Polar     | Arctic |
|  | -0.61 | -0.61  | 0.0031  | -10.92  | 0.000    | 7865    | 32165   | 6    | Atlantic  | Pacific   | Walleye   | Arctic |
|  | 0.92  | 0.92   | 0.0001  | 90.62   | 0.000    | 80688   | 3175    | 6    | Atlantic  | Pacific   | Greenland | Arctic |
|  | -0.21 | -0.21  | 0.0003  | -12.90  | 0.000    | 2038    | 3109    | 6    | Atlantic  | Pacific   | Polar     | Arctic |
|  | -0.61 | -0.61  | 0.0032  | -10.68  | 0.000    | 7762    | 31662   | 6    | Atlantic  | Greenland | Walleye   | Arctic |
|  | 0.93  | 0.93   | 0.0001  | 107.49  | 0.000    | 80688   | 2717    | 6    | Atlantic  | Greenland | Pacific   | Arctic |
|  | -0.21 | -0.21  | 0.0001  | -17.34  | 0.000    | 2005    | 3079    | 6    | Atlantic  | Greenland | Polar     | Arctic |
|  | -0.83 | -0.83  | 0.0007  | -32.02  | 0.000    | 1498    | 15809   | 6    | Atlantic  | Polar     | Walleye   | Arctic |
|  | -0.68 | -0.68  | 0.0011  | -20.53  | 0.000    | 2038    | 10847   | 6    | Atlantic  | Polar     | Pacific   | Arctic |
|  | -0.69 | -0.69  | 0.0010  | -21.52  | 0.000    | 2005    | 10880   | 6    | Atlantic  | Polar     | Greenland | Arctic |
|  | -0.62 | -0.62  | 0.0023  | -12.90  | 0.000    | 7442    | 32165   | 6    | Walleye   | Pacific   | Atlantic  | Arctic |
|  | 0.93  | 0.93   | 0.0001  | 93.56   | 0.000    | 78651   | 2866    | 6    | Walleye   | Pacific   | Greenland | Arctic |
|  | -0.07 | -0.07  | 0.0001  | -7.19   | 0.000    | 2174    | 2485    | 6    | Walleye   | Pacific   | Polar     | Arctic |
|  | -0.61 | -0.61  | 0.0024  | -12.49  | 0.000    | 7653    | 31662   | 6    | Walleye   | Greenland | Atlantic  | Arctic |
|  | 0.93  | 0.93   | 0.0001  | 103.24  | 0.000    | 78651   | 2687    | 6    | Walleye   | Greenland | Pacific   | Arctic |
|  | -0.07 | -0.07  | 0.0001  | -9.14   | 0.000    | 2152    | 2483    | 6    | Walleye   | Greenland | Polar     | Arctic |
|  | -0.75 | -0.75  | 0.0008  | -26.87  | 0.000    | 2251    | 15809   | 6    | Walleye   | Polar     | Atlantic  | Arctic |
|  | -0.67 | -0.67  | 0.0009  | -21.88  | 0.000    | 2174    | 11069   | 6    | Walleye   | Polar     | Pacific   | Arctic |
|  | -0.67 | -0.67  | 0.0010  | -21.84  | 0.000    | 2152    | 11048   | 6    | Walleye   | Polar     | Greenland | Arctic |
|  | 0.08  | 0.08   | 0.0002  | 6.17    | 0.000    | 3175    | 2717    | 6    | Pacific   | Greenland | Atlantic  | Arctic |
|  | 0.03  | 0.03   | 0.0001  | 3.43    | 0.005    | 2866    | 2687    | 6    | Pacific   | Greenland | Walleye   | Arctic |
|  | -0.02 | -0.02  | 0.0005  | -1.05   | 1.000    | 566     | 594     | 6    | Pacific   | Greenland | Polar     | Arctic |
|  | -0.55 | -0.55  | 0.0012  | -15.78  | 0.000    | 3109    | 10847   | 6    | Pacific   | Polar     | Atlantic  | Arctic |
|  | -0.63 | -0.63  | 0.0011  | -19.39  | 0.000    | 2485    | 11069   | 6    | Pacific   | Polar     | Walleye   | Arctic |
|  | -0.96 | -0.96  | 0.0000  | -196.32 | 0.000    | 566     | 29481   | 6    | Pacific   | Polar     | Greenland | Arctic |
|  | -0.56 | -0.56  | 0.0012  | -15.94  | 0.000    | 3079    | 10880   | 6    | Greenland | Polar     | Atlantic  | Arctic |
|  | -0.63 | -0.63  | 0.0011  | -18.73  | 0.000    | 2483    | 11048   | 6    | Greenland | Polar     | Walleye   | Arctic |
|  | -0.96 | -0.96  | 0.0000  | -189.25 | 0.000    | 594     | 29481   | 6    | Greenland | Polar     | Pacific   | Arctic |

LG11

Table S3. (continued)

|  | $D$   | $JK D$ | $VJK D$ | $Z$     | $P_{BY}$ | $nABBA$ | $nBABA$ | $BI$ | $H_1$     | $H_2$     | $H_3$     | $H_4$  |
|--|-------|--------|---------|---------|----------|---------|---------|------|-----------|-----------|-----------|--------|
|  | 0.05  | 0.05   | 0.0001  | 4.17    | 0.000    | 9084    | 8255    | 6    | Atlantic  | Walleye   | Pacific   | Arctic |
|  | 0.03  | 0.03   | 0.0001  | 3.62    | 0.002    | 8903    | 8393    | 6    | Atlantic  | Walleye   | Greenland | Arctic |
|  | -0.17 | -0.17  | 0.0002  | -13.09  | 0.000    | 1557    | 2192    | 6    | Atlantic  | Walleye   | Polar     | Arctic |
|  | -0.57 | -0.57  | 0.0004  | -29.57  | 0.000    | 9084    | 33489   | 6    | Atlantic  | Pacific   | Walleye   | Arctic |
|  | 0.92  | 0.92   | 0.0001  | 120.10  | 0.000    | 81285   | 3212    | 6    | Atlantic  | Pacific   | Greenland | Arctic |
|  | -0.20 | -0.20  | 0.0005  | -9.13   | 0.000    | 2205    | 3291    | 6    | Atlantic  | Pacific   | Polar     | Arctic |
|  | -0.57 | -0.57  | 0.0004  | -28.99  | 0.000    | 8903    | 32932   | 6    | Atlantic  | Greenland | Walleye   | Arctic |
|  | 0.93  | 0.93   | 0.0000  | 141.46  | 0.000    | 81285   | 2806    | 6    | Atlantic  | Greenland | Pacific   | Arctic |
|  | -0.20 | -0.20  | 0.0004  | -9.56   | 0.000    | 2177    | 3250    | 6    | Atlantic  | Greenland | Polar     | Arctic |
|  | -0.80 | -0.80  | 0.0002  | -63.93  | 0.000    | 1557    | 13769   | 6    | Atlantic  | Polar     | Walleye   | Arctic |
|  | -0.62 | -0.62  | 0.0012  | -17.82  | 0.000    | 2205    | 9459    | 6    | Atlantic  | Polar     | Pacific   | Arctic |
|  | -0.63 | -0.63  | 0.0012  | -18.41  | 0.000    | 2177    | 9459    | 6    | Atlantic  | Polar     | Greenland | Arctic |
|  | -0.60 | -0.60  | 0.0004  | -29.12  | 0.000    | 8255    | 33489   | 6    | Walleye   | Pacific   | Atlantic  | Arctic |
|  | 0.93  | 0.93   | 0.0001  | 113.52  | 0.000    | 78672   | 2970    | 6    | Walleye   | Pacific   | Greenland | Arctic |
|  | -0.09 | -0.09  | 0.0003  | -5.29   | 0.000    | 2291    | 2736    | 6    | Walleye   | Pacific   | Polar     | Arctic |
|  | -0.59 | -0.59  | 0.0004  | -29.06  | 0.000    | 8393    | 32932   | 6    | Walleye   | Greenland | Atlantic  | Arctic |
|  | 0.93  | 0.93   | 0.0001  | 109.52  | 0.000    | 78672   | 2821    | 6    | Walleye   | Greenland | Pacific   | Arctic |
|  | -0.09 | -0.09  | 0.0003  | -5.09   | 0.000    | 2278    | 2718    | 6    | Walleye   | Greenland | Polar     | Arctic |
|  | -0.73 | -0.73  | 0.0004  | -38.35  | 0.000    | 2192    | 13769   | 6    | Walleye   | Polar     | Atlantic  | Arctic |
|  | -0.62 | -0.62  | 0.0013  | -17.33  | 0.000    | 2291    | 9730    | 6    | Walleye   | Polar     | Pacific   | Arctic |
|  | -0.62 | -0.62  | 0.0013  | -17.40  | 0.000    | 2278    | 9704    | 6    | Walleye   | Polar     | Greenland | Arctic |
|  | 0.07  | 0.07   | 0.0000  | 17.02   | 0.000    | 3212    | 2806    | 6    | Pacific   | Greenland | Atlantic  | Arctic |
|  | 0.03  | 0.03   | 0.0001  | 2.36    | 0.142    | 2970    | 2821    | 6    | Pacific   | Greenland | Walleye   | Arctic |
|  | 0.01  | 0.01   | 0.0002  | 0.48    | 1.000    | 543     | 536     | 6    | Pacific   | Greenland | Polar     | Arctic |
|  | -0.48 | -0.48  | 0.0014  | -12.71  | 0.000    | 3291    | 9459    | 6    | Pacific   | Polar     | Atlantic  | Arctic |
|  | -0.56 | -0.56  | 0.0011  | -17.01  | 0.000    | 2736    | 9730    | 6    | Pacific   | Polar     | Walleye   | Arctic |
|  | -0.96 | -0.96  | 0.0000  | -283.56 | 0.000    | 543     | 27047   | 6    | Pacific   | Polar     | Greenland | Arctic |
|  | -0.49 | -0.49  | 0.0014  | -13.06  | 0.000    | 3250    | 9459    | 6    | Greenland | Polar     | Atlantic  | Arctic |
|  | -0.56 | -0.56  | 0.0010  | -17.66  | 0.000    | 2718    | 9704    | 6    | Greenland | Polar     | Walleye   | Arctic |
|  | -0.96 | -0.96  | 0.0000  | -246.84 | 0.000    | 536     | 27047   | 6    | Greenland | Polar     | Pacific   | Arctic |

LG12

Table S3. (continued)

|  | $D$   | $JK D$ | $VJK D$ | $Z$     | $P_{BY}$ | $nABBA$ | $nBABA$ | $BI$ | $H_1$     | $H_2$     | $H_3$     | $H_4$  |
|--|-------|--------|---------|---------|----------|---------|---------|------|-----------|-----------|-----------|--------|
|  | 0.04  | 0.04   | 0.0004  | 2.08    | 0.292    | 7809    | 7188    | 6    | Atlantic  | Walleye   | Pacific   | Arctic |
|  | 0.02  | 0.02   | 0.0004  | 1.19    | 1.000    | 7662    | 7301    | 6    | Atlantic  | Walleye   | Greenland | Arctic |
|  | -0.16 | -0.16  | 0.0003  | -9.16   | 0.000    | 1484    | 2055    | 6    | Atlantic  | Walleye   | Polar     | Arctic |
|  | -0.61 | -0.61  | 0.0008  | -21.86  | 0.000    | 7809    | 31734   | 6    | Atlantic  | Pacific   | Walleye   | Arctic |
|  | 0.93  | 0.93   | 0.0001  | 131.63  | 0.000    | 77030   | 2824    | 6    | Atlantic  | Pacific   | Greenland | Arctic |
|  | -0.19 | -0.19  | 0.0004  | -10.29  | 0.000    | 2028    | 3006    | 6    | Atlantic  | Pacific   | Polar     | Arctic |
|  | -0.61 | -0.61  | 0.0008  | -21.91  | 0.000    | 7662    | 31308   | 6    | Atlantic  | Greenland | Walleye   | Arctic |
|  | 0.94  | 0.94   | 0.0000  | 144.18  | 0.000    | 77030   | 2531    | 6    | Atlantic  | Greenland | Pacific   | Arctic |
|  | -0.20 | -0.20  | 0.0004  | -10.31  | 0.000    | 1968    | 2947    | 6    | Atlantic  | Greenland | Polar     | Arctic |
|  | -0.81 | -0.81  | 0.0003  | -46.56  | 0.000    | 1484    | 13942   | 6    | Atlantic  | Polar     | Walleye   | Arctic |
|  | -0.64 | -0.64  | 0.0010  | -19.88  | 0.000    | 2028    | 9284    | 6    | Atlantic  | Polar     | Pacific   | Arctic |
|  | -0.65 | -0.65  | 0.0010  | -21.03  | 0.000    | 1968    | 9317    | 6    | Atlantic  | Polar     | Greenland | Arctic |
|  | -0.63 | -0.63  | 0.0003  | -34.40  | 0.000    | 7188    | 31734   | 6    | Walleye   | Pacific   | Atlantic  | Arctic |
|  | 0.93  | 0.93   | 0.0001  | 130.21  | 0.000    | 74553   | 2536    | 6    | Walleye   | Pacific   | Greenland | Arctic |
|  | -0.09 | -0.09  | 0.0002  | -6.19   | 0.000    | 2111    | 2523    | 6    | Walleye   | Pacific   | Polar     | Arctic |
|  | -0.62 | -0.62  | 0.0004  | -31.53  | 0.000    | 7301    | 31308   | 6    | Walleye   | Greenland | Atlantic  | Arctic |
|  | 0.94  | 0.94   | 0.0001  | 128.28  | 0.000    | 74553   | 2414    | 6    | Walleye   | Greenland | Pacific   | Arctic |
|  | -0.10 | -0.10  | 0.0003  | -5.75   | 0.000    | 2058    | 2491    | 6    | Walleye   | Greenland | Polar     | Arctic |
|  | -0.74 | -0.74  | 0.0003  | -41.68  | 0.000    | 2055    | 13942   | 6    | Walleye   | Polar     | Atlantic  | Arctic |
|  | -0.64 | -0.64  | 0.0008  | -22.58  | 0.000    | 2111    | 9483    | 6    | Walleye   | Polar     | Pacific   | Arctic |
|  | -0.64 | -0.64  | 0.0008  | -22.77  | 0.000    | 2058    | 9496    | 6    | Walleye   | Polar     | Greenland | Arctic |
|  | 0.05  | 0.05   | 0.0002  | 4.38    | 0.000    | 2824    | 2531    | 6    | Pacific   | Greenland | Atlantic  | Arctic |
|  | 0.02  | 0.02   | 0.0001  | 2.52    | 0.093    | 2536    | 2414    | 6    | Pacific   | Greenland | Walleye   | Arctic |
|  | -0.02 | -0.02  | 0.0006  | -0.73   | 1.000    | 489     | 508     | 6    | Pacific   | Greenland | Polar     | Arctic |
|  | -0.51 | -0.51  | 0.0009  | -16.98  | 0.000    | 3006    | 9284    | 6    | Pacific   | Polar     | Atlantic  | Arctic |
|  | -0.58 | -0.58  | 0.0007  | -22.32  | 0.000    | 2523    | 9483    | 6    | Pacific   | Polar     | Walleye   | Arctic |
|  | -0.96 | -0.96  | 0.0000  | -273.96 | 0.000    | 489     | 26555   | 6    | Pacific   | Polar     | Greenland | Arctic |
|  | -0.52 | -0.52  | 0.0008  | -18.38  | 0.000    | 2947    | 9317    | 6    | Greenland | Polar     | Atlantic  | Arctic |
|  | -0.58 | -0.58  | 0.0006  | -23.21  | 0.000    | 2491    | 9496    | 6    | Greenland | Polar     | Walleye   | Arctic |
|  | -0.96 | -0.96  | 0.0000  | -243.38 | 0.000    | 508     | 26555   | 6    | Greenland | Polar     | Pacific   | Arctic |

LG13

Table S3. (continued)

|  | $D$   | $JK D$ | $VJK D$ | $Z$     | $P_{BY}$ | $nABBA$ | $nBABA$ | $BI$ | $H_1$     | $H_2$     | $H_3$     | $H_4$  |
|--|-------|--------|---------|---------|----------|---------|---------|------|-----------|-----------|-----------|--------|
|  | 0.02  | 0.02   | 0.0002  | 1.79    | 0.557    | 7861    | 7489    | 6    | Atlantic  | Walleye   | Pacific   | Arctic |
|  | 0.01  | 0.01   | 0.0002  | 0.56    | 1.000    | 7690    | 7559    | 6    | Atlantic  | Walleye   | Greenland | Arctic |
|  | -0.25 | -0.25  | 0.0002  | -18.41  | 0.000    | 1368    | 2261    | 6    | Atlantic  | Walleye   | Polar     | Arctic |
|  | -0.66 | -0.66  | 0.0014  | -17.64  | 0.000    | 7861    | 38059   | 6    | Atlantic  | Pacific   | Walleye   | Arctic |
|  | 0.93  | 0.93   | 0.0000  | 170.49  | 0.000    | 85819   | 2942    | 6    | Atlantic  | Pacific   | Greenland | Arctic |
|  | -0.21 | -0.21  | 0.0001  | -18.27  | 0.000    | 2199    | 3382    | 6    | Atlantic  | Pacific   | Polar     | Arctic |
|  | -0.66 | -0.66  | 0.0015  | -17.11  | 0.000    | 7690    | 37533   | 6    | Atlantic  | Greenland | Walleye   | Arctic |
|  | 0.94  | 0.94   | 0.0000  | 200.32  | 0.000    | 85819   | 2591    | 6    | Atlantic  | Greenland | Pacific   | Arctic |
|  | -0.21 | -0.21  | 0.0002  | -16.83  | 0.000    | 2177    | 3326    | 6    | Atlantic  | Greenland | Polar     | Arctic |
|  | -0.84 | -0.84  | 0.0003  | -47.89  | 0.000    | 1368    | 16201   | 6    | Atlantic  | Polar     | Walleye   | Arctic |
|  | -0.66 | -0.66  | 0.0010  | -20.93  | 0.000    | 2199    | 10587   | 6    | Atlantic  | Polar     | Pacific   | Arctic |
|  | -0.66 | -0.66  | 0.0011  | -19.96  | 0.000    | 2177    | 10592   | 6    | Atlantic  | Polar     | Greenland | Arctic |
|  | -0.67 | -0.67  | 0.0010  | -21.07  | 0.000    | 7489    | 38059   | 6    | Walleye   | Pacific   | Atlantic  | Arctic |
|  | 0.94  | 0.94   | 0.0000  | 159.14  | 0.000    | 83623   | 2670    | 6    | Walleye   | Pacific   | Greenland | Arctic |
|  | -0.06 | -0.06  | 0.0001  | -6.02   | 0.000    | 2393    | 2698    | 6    | Walleye   | Pacific   | Polar     | Arctic |
|  | -0.66 | -0.66  | 0.0011  | -20.37  | 0.000    | 7559    | 37533   | 6    | Walleye   | Greenland | Atlantic  | Arctic |
|  | 0.94  | 0.94   | 0.0000  | 191.57  | 0.000    | 83623   | 2557    | 6    | Walleye   | Greenland | Pacific   | Arctic |
|  | -0.06 | -0.06  | 0.0001  | -6.57   | 0.000    | 2364    | 2670    | 6    | Walleye   | Greenland | Polar     | Arctic |
|  | -0.76 | -0.76  | 0.0007  | -28.96  | 0.000    | 2261    | 16201   | 6    | Walleye   | Polar     | Atlantic  | Arctic |
|  | -0.64 | -0.64  | 0.0010  | -19.82  | 0.000    | 2393    | 10783   | 6    | Walleye   | Polar     | Pacific   | Arctic |
|  | -0.64 | -0.64  | 0.0011  | -19.05  | 0.000    | 2364    | 10757   | 6    | Walleye   | Polar     | Greenland | Arctic |
|  | 0.06  | 0.06   | 0.0000  | 9.06    | 0.000    | 2942    | 2591    | 6    | Pacific   | Greenland | Atlantic  | Arctic |
|  | 0.02  | 0.02   | 0.0001  | 2.27    | 0.180    | 2670    | 2557    | 6    | Pacific   | Greenland | Walleye   | Arctic |
|  | -0.01 | -0.01  | 0.0007  | -0.27   | 1.000    | 524     | 531     | 6    | Pacific   | Greenland | Polar     | Arctic |
|  | -0.52 | -0.52  | 0.0016  | -12.76  | 0.000    | 3382    | 10587   | 6    | Pacific   | Polar     | Atlantic  | Arctic |
|  | -0.60 | -0.60  | 0.0012  | -17.03  | 0.000    | 2698    | 10783   | 6    | Pacific   | Polar     | Walleye   | Arctic |
|  | -0.97 | -0.97  | 0.0000  | -303.64 | 0.000    | 524     | 29863   | 6    | Pacific   | Polar     | Greenland | Arctic |
|  | -0.52 | -0.52  | 0.0015  | -13.48  | 0.000    | 3326    | 10592   | 6    | Greenland | Polar     | Atlantic  | Arctic |
|  | -0.60 | -0.60  | 0.0012  | -17.68  | 0.000    | 2670    | 10757   | 6    | Greenland | Polar     | Walleye   | Arctic |
|  | -0.97 | -0.97  | 0.0000  | -375.95 | 0.000    | 531     | 29863   | 6    | Greenland | Polar     | Pacific   | Arctic |

LG14

Table S3. (continued)

|  | $D$   | $JK D$ | $VJK D$ | $Z$     | $P_{BY}$ | $nABBA$ | $nBABA$ | $BI$ | $H_1$     | $H_2$     | $H_3$     | $H_4$  |
|--|-------|--------|---------|---------|----------|---------|---------|------|-----------|-----------|-----------|--------|
|  | 0.04  | 0.04   | 0.0003  | 2.33    | 0.153    | 7851    | 7291    | 6    | Atlantic  | Walleye   | Pacific   | Arctic |
|  | 0.02  | 0.02   | 0.0003  | 0.92    | 1.000    | 7622    | 7370    | 6    | Atlantic  | Walleye   | Greenland | Arctic |
|  | -0.17 | -0.17  | 0.0006  | -6.88   | 0.000    | 1489    | 2096    | 6    | Atlantic  | Walleye   | Polar     | Arctic |
|  | -0.57 | -0.57  | 0.0015  | -14.96  | 0.000    | 7851    | 28827   | 6    | Atlantic  | Pacific   | Walleye   | Arctic |
|  | 0.92  | 0.92   | 0.0002  | 68.31   | 0.000    | 73241   | 3061    | 6    | Atlantic  | Pacific   | Greenland | Arctic |
|  | -0.17 | -0.17  | 0.0002  | -12.83  | 0.000    | 1979    | 2784    | 6    | Atlantic  | Pacific   | Polar     | Arctic |
|  | -0.58 | -0.58  | 0.0013  | -15.75  | 0.000    | 7622    | 28485   | 6    | Atlantic  | Greenland | Walleye   | Arctic |
|  | 0.93  | 0.93   | 0.0002  | 72.64   | 0.000    | 73241   | 2830    | 6    | Atlantic  | Greenland | Pacific   | Arctic |
|  | -0.17 | -0.17  | 0.0004  | -9.28   | 0.000    | 1952    | 2775    | 6    | Atlantic  | Greenland | Polar     | Arctic |
|  | -0.80 | -0.80  | 0.0009  | -27.18  | 0.000    | 1489    | 13105   | 6    | Atlantic  | Polar     | Walleye   | Arctic |
|  | -0.64 | -0.64  | 0.0013  | -17.44  | 0.000    | 1979    | 8990    | 6    | Atlantic  | Polar     | Pacific   | Arctic |
|  | -0.64 | -0.64  | 0.0016  | -15.90  | 0.000    | 1952    | 8981    | 6    | Atlantic  | Polar     | Greenland | Arctic |
|  | -0.60 | -0.60  | 0.0014  | -16.04  | 0.000    | 7291    | 28827   | 6    | Walleye   | Pacific   | Atlantic  | Arctic |
|  | 0.93  | 0.93   | 0.0002  | 69.81   | 0.000    | 70946   | 2737    | 6    | Walleye   | Pacific   | Greenland | Arctic |
|  | -0.04 | -0.04  | 0.0003  | -2.16   | 0.240    | 2104    | 2268    | 6    | Walleye   | Pacific   | Polar     | Arctic |
|  | -0.59 | -0.59  | 0.0014  | -15.54  | 0.000    | 7370    | 28485   | 6    | Walleye   | Greenland | Atlantic  | Arctic |
|  | 0.92  | 0.92   | 0.0002  | 65.90   | 0.000    | 70946   | 2781    | 6    | Walleye   | Greenland | Pacific   | Arctic |
|  | -0.05 | -0.05  | 0.0004  | -2.40   | 0.129    | 2067    | 2275    | 6    | Walleye   | Greenland | Polar     | Arctic |
|  | -0.72 | -0.72  | 0.0009  | -23.95  | 0.000    | 2096    | 13105   | 6    | Walleye   | Polar     | Atlantic  | Arctic |
|  | -0.63 | -0.63  | 0.0014  | -16.74  | 0.000    | 2104    | 9213    | 6    | Walleye   | Polar     | Pacific   | Arctic |
|  | -0.63 | -0.63  | 0.0016  | -15.77  | 0.000    | 2067    | 9115    | 6    | Walleye   | Polar     | Greenland | Arctic |
|  | 0.04  | 0.04   | 0.0001  | 3.40    | 0.006    | 3061    | 2830    | 6    | Pacific   | Greenland | Atlantic  | Arctic |
|  | -0.01 | -0.01  | 0.0002  | -0.50   | 1.000    | 2737    | 2781    | 6    | Pacific   | Greenland | Walleye   | Arctic |
|  | -0.01 | -0.01  | 0.0003  | -0.71   | 1.000    | 559     | 573     | 6    | Pacific   | Greenland | Polar     | Arctic |
|  | -0.53 | -0.53  | 0.0014  | -13.98  | 0.000    | 2784    | 8990    | 6    | Pacific   | Polar     | Atlantic  | Arctic |
|  | -0.60 | -0.60  | 0.0012  | -17.27  | 0.000    | 2268    | 9213    | 6    | Pacific   | Polar     | Walleye   | Arctic |
|  | -0.96 | -0.96  | 0.0001  | -102.79 | 0.000    | 559     | 25076   | 6    | Pacific   | Polar     | Greenland | Arctic |
|  | -0.53 | -0.53  | 0.0014  | -13.94  | 0.000    | 2775    | 8981    | 6    | Greenland | Polar     | Atlantic  | Arctic |
|  | -0.60 | -0.60  | 0.0013  | -16.88  | 0.000    | 2275    | 9115    | 6    | Greenland | Polar     | Walleye   | Arctic |
|  | -0.96 | -0.96  | 0.0001  | -104.18 | 0.000    | 573     | 25076   | 6    | Greenland | Polar     | Pacific   | Arctic |

LG15

Table S3. (continued)

|  | $D$   | JK $D$ | V.JK $D$ | $Z$     | $P_{BY}$ | $n_{ABBA}$ | $n_{BABA}$ | BI | $H_1$     | $H_2$     | $H_3$     | $H_4$  |
|--|-------|--------|----------|---------|----------|------------|------------|----|-----------|-----------|-----------|--------|
|  | 0.04  | 0.04   | 0.0001   | 5.09    | 0.000    | 8976       | 8240       | 7  | Atlantic  | Walleye   | Pacific   | Arctic |
|  | 0.02  | 0.02   | 0.0001   | 2.22    | 0.207    | 8749       | 8327       | 7  | Atlantic  | Walleye   | Greenland | Arctic |
|  | -0.18 | -0.18  | 0.0005   | -7.97   | 0.000    | 1646       | 2365       | 7  | Atlantic  | Walleye   | Polar     | Arctic |
|  | -0.59 | -0.59  | 0.0012   | -17.12  | 0.000    | 8976       | 35112      | 7  | Atlantic  | Pacific   | Walleye   | Arctic |
|  | 0.92  | 0.92   | 0.0002   | 72.81   | 0.000    | 86871      | 3540       | 7  | Atlantic  | Pacific   | Greenland | Arctic |
|  | -0.16 | -0.16  | 0.0009   | -5.42   | 0.000    | 2426       | 3357       | 7  | Atlantic  | Pacific   | Polar     | Arctic |
|  | -0.60 | -0.60  | 0.0012   | -17.25  | 0.000    | 8749       | 34610      | 7  | Atlantic  | Greenland | Walleye   | Arctic |
|  | 0.93  | 0.93   | 0.0002   | 75.39   | 0.000    | 86871      | 3271       | 7  | Atlantic  | Greenland | Pacific   | Arctic |
|  | -0.16 | -0.16  | 0.0007   | -6.00   | 0.000    | 2378       | 3310       | 7  | Atlantic  | Greenland | Polar     | Arctic |
|  | -0.81 | -0.81  | 0.0006   | -33.25  | 0.000    | 1646       | 15596      | 7  | Atlantic  | Polar     | Walleye   | Arctic |
|  | -0.63 | -0.63  | 0.0016   | -15.89  | 0.000    | 2426       | 10634      | 7  | Atlantic  | Polar     | Pacific   | Arctic |
|  | -0.64 | -0.64  | 0.0016   | -16.04  | 0.000    | 2378       | 10668      | 7  | Atlantic  | Polar     | Greenland | Arctic |
|  | -0.62 | -0.62  | 0.0009   | -21.03  | 0.000    | 8240       | 35112      | 7  | Walleye   | Pacific   | Atlantic  | Arctic |
|  | 0.93  | 0.93   | 0.0002   | 66.75   | 0.000    | 84071      | 3275       | 7  | Walleye   | Pacific   | Greenland | Arctic |
|  | -0.05 | -0.05  | 0.0006   | -1.81   | 0.534    | 2496       | 2735       | 7  | Walleye   | Pacific   | Polar     | Arctic |
|  | -0.61 | -0.61  | 0.0009   | -20.77  | 0.000    | 8327       | 34610      | 7  | Walleye   | Greenland | Atlantic  | Arctic |
|  | 0.93  | 0.93   | 0.0002   | 67.57   | 0.000    | 84071      | 3252       | 7  | Walleye   | Greenland | Pacific   | Arctic |
|  | -0.04 | -0.04  | 0.0005   | -1.91   | 0.431    | 2467       | 2696       | 7  | Walleye   | Greenland | Polar     | Arctic |
|  | -0.74 | -0.74  | 0.0006   | -30.53  | 0.000    | 2365       | 15596      | 7  | Walleye   | Polar     | Atlantic  | Arctic |
|  | -0.63 | -0.63  | 0.0014   | -16.71  | 0.000    | 2496       | 10854      | 7  | Walleye   | Polar     | Pacific   | Arctic |
|  | -0.63 | -0.63  | 0.0015   | -16.41  | 0.000    | 2467       | 10823      | 7  | Walleye   | Polar     | Greenland | Arctic |
|  | 0.04  | 0.04   | 0.0001   | 4.63    | 0.000    | 3540       | 3271       | 7  | Pacific   | Greenland | Atlantic  | Arctic |
|  | 0.00  | 0.00   | 0.0001   | 0.39    | 1.000    | 3275       | 3252       | 7  | Pacific   | Greenland | Walleye   | Arctic |
|  | -0.00 | -0.00  | 0.0007   | -0.05   | 1.000    | 628        | 630        | 7  | Pacific   | Greenland | Polar     | Arctic |
|  | -0.52 | -0.52  | 0.0014   | -14.01  | 0.000    | 3357       | 10634      | 7  | Pacific   | Polar     | Atlantic  | Arctic |
|  | -0.60 | -0.60  | 0.0014   | -16.09  | 0.000    | 2735       | 10854      | 7  | Pacific   | Polar     | Walleye   | Arctic |
|  | -0.96 | -0.96  | 0.0000   | -145.57 | 0.000    | 628        | 29638      | 7  | Pacific   | Polar     | Greenland | Arctic |
|  | -0.53 | -0.53  | 0.0013   | -14.75  | 0.000    | 3310       | 10668      | 7  | Greenland | Polar     | Atlantic  | Arctic |
|  | -0.60 | -0.60  | 0.0013   | -16.55  | 0.000    | 2696       | 10823      | 7  | Greenland | Polar     | Walleye   | Arctic |
|  | -0.96 | -0.96  | 0.0001   | -130.73 | 0.000    | 630        | 29638      | 7  | Greenland | Polar     | Pacific   | Arctic |

LG16



Table S3. (continued)

|  | $D$   | $JK D$ | $VJK D$ | $Z$     | $P_{BY}$ | $nABBA$ | $nBABA$ | $BI$ | $H_1$     | $H_2$     | $H_3$     | $H_4$  |
|--|-------|--------|---------|---------|----------|---------|---------|------|-----------|-----------|-----------|--------|
|  | 0.08  | 0.08   | 0.0003  | 4.89    | 0.000    | 7478    | 6335    | 4    | Atlantic  | Walleye   | Pacific   | Arctic |
|  | 0.06  | 0.06   | 0.0003  | 3.45    | 0.005    | 7198    | 6343    | 4    | Atlantic  | Walleye   | Greenland | Arctic |
|  | -0.15 | -0.15  | 0.0004  | -7.22   | 0.000    | 1091    | 1467    | 4    | Atlantic  | Walleye   | Polar     | Arctic |
|  | -0.48 | -0.48  | 0.0003  | -25.77  | 0.000    | 7478    | 21381   | 4    | Atlantic  | Pacific   | Walleye   | Arctic |
|  | 0.91  | 0.91   | 0.0001  | 95.42   | 0.000    | 55103   | 2591    | 4    | Atlantic  | Pacific   | Greenland | Arctic |
|  | -0.18 | -0.18  | 0.0006  | -7.51   | 0.000    | 1347    | 1931    | 4    | Atlantic  | Pacific   | Polar     | Arctic |
|  | -0.49 | -0.49  | 0.0003  | -26.93  | 0.000    | 7198    | 20853   | 4    | Atlantic  | Greenland | Walleye   | Arctic |
|  | 0.92  | 0.92   | 0.0001  | 95.37   | 0.000    | 55103   | 2348    | 4    | Atlantic  | Greenland | Pacific   | Arctic |
|  | -0.19 | -0.19  | 0.0004  | -9.19   | 0.000    | 1299    | 1899    | 4    | Atlantic  | Greenland | Polar     | Arctic |
|  | -0.74 | -0.74  | 0.0003  | -43.00  | 0.000    | 1091    | 7221    | 4    | Atlantic  | Polar     | Walleye   | Arctic |
|  | -0.58 | -0.58  | 0.0004  | -28.30  | 0.000    | 1347    | 5099    | 4    | Atlantic  | Polar     | Pacific   | Arctic |
|  | -0.59 | -0.59  | 0.0007  | -21.83  | 0.000    | 1299    | 5061    | 4    | Atlantic  | Polar     | Greenland | Arctic |
|  | -0.54 | -0.54  | 0.0001  | -63.33  | 0.000    | 6335    | 21381   | 4    | Walleye   | Pacific   | Atlantic  | Arctic |
|  | 0.91  | 0.91   | 0.0001  | 101.02  | 0.000    | 52376   | 2388    | 4    | Walleye   | Pacific   | Greenland | Arctic |
|  | -0.06 | -0.06  | 0.0006  | -2.32   | 0.158    | 1430    | 1600    | 4    | Walleye   | Pacific   | Polar     | Arctic |
|  | -0.53 | -0.53  | 0.0001  | -50.57  | 0.000    | 6343    | 20853   | 4    | Walleye   | Greenland | Atlantic  | Arctic |
|  | 0.92  | 0.92   | 0.0001  | 82.71   | 0.000    | 52376   | 2310    | 4    | Walleye   | Greenland | Pacific   | Arctic |
|  | -0.06 | -0.06  | 0.0007  | -2.34   | 0.151    | 1394    | 1572    | 4    | Walleye   | Greenland | Polar     | Arctic |
|  | -0.66 | -0.66  | 0.0003  | -38.28  | 0.000    | 1467    | 7221    | 4    | Walleye   | Polar     | Atlantic  | Arctic |
|  | -0.58 | -0.58  | 0.0009  | -19.59  | 0.000    | 1430    | 5320    | 4    | Walleye   | Polar     | Pacific   | Arctic |
|  | -0.58 | -0.58  | 0.0011  | -17.45  | 0.000    | 1394    | 5281    | 4    | Walleye   | Polar     | Greenland | Arctic |
|  | 0.05  | 0.05   | 0.0001  | 4.34    | 0.000    | 2591    | 2348    | 4    | Pacific   | Greenland | Atlantic  | Arctic |
|  | 0.02  | 0.02   | 0.0002  | 1.24    | 1.000    | 2388    | 2310    | 4    | Pacific   | Greenland | Walleye   | Arctic |
|  | -0.01 | -0.01  | 0.0020  | -0.30   | 1.000    | 416     | 428     | 4    | Pacific   | Greenland | Polar     | Arctic |
|  | -0.45 | -0.45  | 0.0019  | -10.35  | 0.000    | 1931    | 5099    | 4    | Pacific   | Polar     | Atlantic  | Arctic |
|  | -0.54 | -0.54  | 0.0016  | -13.28  | 0.000    | 1600    | 5320    | 4    | Pacific   | Polar     | Walleye   | Arctic |
|  | -0.94 | -0.94  | 0.0000  | -487.49 | 0.000    | 416     | 14296   | 4    | Pacific   | Polar     | Greenland | Arctic |
|  | -0.45 | -0.45  | 0.0018  | -10.79  | 0.000    | 1899    | 5061    | 4    | Greenland | Polar     | Atlantic  | Arctic |
|  | -0.54 | -0.54  | 0.0015  | -13.89  | 0.000    | 1572    | 5281    | 4    | Greenland | Polar     | Walleye   | Arctic |
|  | -0.94 | -0.94  | 0.0000  | -209.43 | 0.000    | 428     | 14296   | 4    | Greenland | Polar     | Pacific   | Arctic |

LG17

Table S3. (continued)

|  | $D$   | $JK D$ | $VJK D$ | $Z$     | $P_{BY}$ | $nABBA$ | $nBABA$ | $BI$ | $H_1$     | $H_2$     | $H_3$     | $H_4$  |
|--|-------|--------|---------|---------|----------|---------|---------|------|-----------|-----------|-----------|--------|
|  | 0.04  | 0.04   | 0.0002  | 2.93    | 0.027    | 7783    | 7224    | 5    | Atlantic  | Walleye   | Pacific   | Arctic |
|  | 0.02  | 0.02   | 0.0003  | 0.88    | 1.000    | 7545    | 7316    | 5    | Atlantic  | Walleye   | Greenland | Arctic |
|  | -0.18 | -0.18  | 0.0002  | -13.82  | 0.000    | 1217    | 1765    | 5    | Atlantic  | Walleye   | Polar     | Arctic |
|  | -0.57 | -0.57  | 0.0007  | -21.12  | 0.000    | 7783    | 28116   | 5    | Atlantic  | Pacific   | Walleye   | Arctic |
|  | 0.93  | 0.93   | 0.0001  | 90.42   | 0.000    | 69880   | 2544    | 5    | Atlantic  | Pacific   | Greenland | Arctic |
|  | -0.21 | -0.21  | 0.0001  | -17.39  | 0.000    | 1712    | 2598    | 5    | Atlantic  | Pacific   | Polar     | Arctic |
|  | -0.57 | -0.57  | 0.0007  | -21.93  | 0.000    | 7545    | 27634   | 5    | Atlantic  | Greenland | Walleye   | Arctic |
|  | 0.94  | 0.94   | 0.0001  | 95.10   | 0.000    | 69880   | 2277    | 5    | Atlantic  | Greenland | Pacific   | Arctic |
|  | -0.20 | -0.20  | 0.0001  | -17.06  | 0.000    | 1700    | 2529    | 5    | Atlantic  | Greenland | Polar     | Arctic |
|  | -0.79 | -0.79  | 0.0003  | -47.36  | 0.000    | 1217    | 10570   | 5    | Atlantic  | Polar     | Walleye   | Arctic |
|  | -0.62 | -0.62  | 0.0005  | -28.41  | 0.000    | 1712    | 7392    | 5    | Atlantic  | Polar     | Pacific   | Arctic |
|  | -0.63 | -0.63  | 0.0005  | -28.32  | 0.000    | 1700    | 7408    | 5    | Atlantic  | Polar     | Greenland | Arctic |
|  | -0.59 | -0.59  | 0.0005  | -25.84  | 0.000    | 7224    | 28116   | 5    | Walleye   | Pacific   | Atlantic  | Arctic |
|  | 0.94  | 0.94   | 0.0001  | 95.29   | 0.000    | 67876   | 2270    | 5    | Walleye   | Pacific   | Greenland | Arctic |
|  | -0.09 | -0.09  | 0.0001  | -9.12   | 0.000    | 1816    | 2158    | 5    | Walleye   | Pacific   | Polar     | Arctic |
|  | -0.58 | -0.58  | 0.0006  | -24.73  | 0.000    | 7316    | 27634   | 5    | Walleye   | Greenland | Atlantic  | Arctic |
|  | 0.94  | 0.94   | 0.0001  | 91.52   | 0.000    | 67876   | 2216    | 5    | Walleye   | Greenland | Pacific   | Arctic |
|  | -0.08 | -0.08  | 0.0001  | -7.47   | 0.000    | 1807    | 2103    | 5    | Walleye   | Greenland | Polar     | Arctic |
|  | -0.71 | -0.71  | 0.0005  | -30.79  | 0.000    | 1765    | 10570   | 5    | Walleye   | Polar     | Atlantic  | Arctic |
|  | -0.61 | -0.61  | 0.0004  | -29.83  | 0.000    | 1816    | 7568    | 5    | Walleye   | Polar     | Pacific   | Arctic |
|  | -0.61 | -0.61  | 0.0005  | -27.26  | 0.000    | 1807    | 7535    | 5    | Walleye   | Polar     | Greenland | Arctic |
|  | 0.06  | 0.06   | 0.0002  | 3.68    | 0.002    | 2544    | 2277    | 5    | Pacific   | Greenland | Atlantic  | Arctic |
|  | 0.01  | 0.01   | 0.0002  | 0.89    | 1.000    | 2270    | 2216    | 5    | Pacific   | Greenland | Walleye   | Arctic |
|  | 0.03  | 0.03   | 0.0003  | 1.52    | 0.982    | 427     | 405     | 5    | Pacific   | Greenland | Polar     | Arctic |
|  | -0.48 | -0.48  | 0.0007  | -17.66  | 0.000    | 2598    | 7392    | 5    | Pacific   | Polar     | Atlantic  | Arctic |
|  | -0.56 | -0.56  | 0.0005  | -25.24  | 0.000    | 2158    | 7568    | 5    | Pacific   | Polar     | Walleye   | Arctic |
|  | -0.96 | -0.96  | 0.0000  | -148.37 | 0.000    | 427     | 21086   | 5    | Pacific   | Polar     | Greenland | Arctic |
|  | -0.49 | -0.49  | 0.0007  | -18.08  | 0.000    | 2529    | 7408    | 5    | Greenland | Polar     | Atlantic  | Arctic |
|  | -0.56 | -0.56  | 0.0005  | -25.63  | 0.000    | 2103    | 7535    | 5    | Greenland | Polar     | Walleye   | Arctic |
|  | -0.96 | -0.96  | 0.0000  | -148.95 | 0.000    | 405     | 21086   | 5    | Greenland | Polar     | Pacific   | Arctic |

LG18

Table S3. (continued)

|  | $D$   | $JK D$ | $VJK D$ | $Z$     | $P_{BY}$ | $nABBA$ | $nBABA$ | $BI$ | $H_1$     | $H_2$     | $H_3$     | $H_4$  |
|--|-------|--------|---------|---------|----------|---------|---------|------|-----------|-----------|-----------|--------|
|  | 0.05  | 0.05   | 0.0001  | 4.21    | 0.000    | 7525    | 6861    | 5    | Atlantic  | Walleye   | Pacific   | Arctic |
|  | 0.04  | 0.04   | 0.0001  | 4.06    | 0.000    | 7368    | 6837    | 5    | Atlantic  | Walleye   | Greenland | Arctic |
|  | -0.20 | -0.20  | 0.0001  | -16.31  | 0.000    | 1102    | 1649    | 5    | Atlantic  | Walleye   | Polar     | Arctic |
|  | -0.56 | -0.56  | 0.0011  | -16.41  | 0.000    | 7525    | 26308   | 5    | Atlantic  | Pacific   | Walleye   | Arctic |
|  | 0.93  | 0.93   | 0.0001  | 112.32  | 0.000    | 67172   | 2359    | 5    | Atlantic  | Pacific   | Greenland | Arctic |
|  | -0.19 | -0.19  | 0.0001  | -17.83  | 0.000    | 1535    | 2266    | 5    | Atlantic  | Pacific   | Polar     | Arctic |
|  | -0.56 | -0.56  | 0.0011  | -16.45  | 0.000    | 7368    | 25946   | 5    | Atlantic  | Greenland | Walleye   | Arctic |
|  | 0.94  | 0.94   | 0.0001  | 113.87  | 0.000    | 67172   | 2198    | 5    | Atlantic  | Greenland | Pacific   | Arctic |
|  | -0.20 | -0.20  | 0.0001  | -26.00  | 0.000    | 1493    | 2262    | 5    | Atlantic  | Greenland | Polar     | Arctic |
|  | -0.79 | -0.79  | 0.0002  | -55.15  | 0.000    | 1102    | 9469    | 5    | Atlantic  | Polar     | Walleye   | Arctic |
|  | -0.62 | -0.62  | 0.0003  | -33.81  | 0.000    | 1535    | 6542    | 5    | Atlantic  | Polar     | Pacific   | Arctic |
|  | -0.63 | -0.63  | 0.0003  | -34.46  | 0.000    | 1493    | 6543    | 5    | Atlantic  | Polar     | Greenland | Arctic |
|  | -0.59 | -0.59  | 0.0013  | -16.08  | 0.000    | 6861    | 26308   | 5    | Walleye   | Pacific   | Atlantic  | Arctic |
|  | 0.94  | 0.94   | 0.0001  | 108.23  | 0.000    | 64873   | 2166    | 5    | Walleye   | Pacific   | Greenland | Arctic |
|  | -0.05 | -0.05  | 0.0003  | -2.92   | 0.028    | 1686    | 1854    | 5    | Walleye   | Pacific   | Polar     | Arctic |
|  | -0.58 | -0.58  | 0.0013  | -15.99  | 0.000    | 6837    | 25946   | 5    | Walleye   | Greenland | Atlantic  | Arctic |
|  | 0.94  | 0.94   | 0.0001  | 127.64  | 0.000    | 64873   | 2103    | 5    | Walleye   | Greenland | Pacific   | Arctic |
|  | -0.06 | -0.06  | 0.0002  | -4.07   | 0.000    | 1635    | 1853    | 5    | Walleye   | Greenland | Polar     | Arctic |
|  | -0.70 | -0.70  | 0.0004  | -36.37  | 0.000    | 1649    | 9469    | 5    | Walleye   | Polar     | Atlantic  | Arctic |
|  | -0.60 | -0.60  | 0.0005  | -27.63  | 0.000    | 1686    | 6764    | 5    | Walleye   | Polar     | Pacific   | Arctic |
|  | -0.61 | -0.61  | 0.0005  | -27.47  | 0.000    | 1635    | 6741    | 5    | Walleye   | Polar     | Greenland | Arctic |
|  | 0.04  | 0.04   | 0.0001  | 3.50    | 0.004    | 2359    | 2198    | 5    | Pacific   | Greenland | Atlantic  | Arctic |
|  | 0.01  | 0.01   | 0.0002  | 1.06    | 1.000    | 2166    | 2103    | 5    | Pacific   | Greenland | Walleye   | Arctic |
|  | -0.04 | -0.04  | 0.0007  | -1.67   | 0.724    | 347     | 379     | 5    | Pacific   | Greenland | Polar     | Arctic |
|  | -0.49 | -0.49  | 0.0003  | -27.61  | 0.000    | 2266    | 6542    | 5    | Pacific   | Polar     | Atlantic  | Arctic |
|  | -0.57 | -0.57  | 0.0002  | -37.99  | 0.000    | 1854    | 6764    | 5    | Pacific   | Polar     | Walleye   | Arctic |
|  | -0.96 | -0.96  | 0.0000  | -279.53 | 0.000    | 347     | 18971   | 5    | Pacific   | Polar     | Greenland | Arctic |
|  | -0.49 | -0.49  | 0.0003  | -27.26  | 0.000    | 2262    | 6543    | 5    | Greenland | Polar     | Atlantic  | Arctic |
|  | -0.57 | -0.57  | 0.0002  | -37.28  | 0.000    | 1853    | 6741    | 5    | Greenland | Polar     | Walleye   | Arctic |
|  | -0.96 | -0.96  | 0.0000  | -212.54 | 0.000    | 379     | 18971   | 5    | Greenland | Polar     | Pacific   | Arctic |

LG19

Table S3. (continued)

|      | $D$   | $JK D$ | $VJK D$ | $Z$     | $P_{BY}$ | $nABBA$ | $nBABA$ | $BI$ | $H_1$     | $H_2$     | $H_3$     | $H_4$  |
|------|-------|--------|---------|---------|----------|---------|---------|------|-----------|-----------|-----------|--------|
|      | 0.01  | 0.01   | 0.0003  | 0.32    | 1.000    | 6140    | 6072    | 5    | Atlantic  | Walleye   | Pacific   | Arctic |
|      | -0.02 | -0.02  | 0.0002  | -1.08   | 1.000    | 5962    | 6148    | 5    | Atlantic  | Walleye   | Greenland | Arctic |
|      | -0.21 | -0.21  | 0.0001  | -18.89  | 0.000    | 1143    | 1735    | 5    | Atlantic  | Walleye   | Polar     | Arctic |
|      | -0.61 | -0.61  | 0.0016  | -15.42  | 0.000    | 6140    | 25588   | 5    | Atlantic  | Pacific   | Walleye   | Arctic |
|      | 0.93  | 0.93   | 0.0001  | 83.41   | 0.000    | 67635   | 2407    | 5    | Atlantic  | Pacific   | Greenland | Arctic |
|      | -0.14 | -0.14  | 0.0004  | -7.45   | 0.000    | 1756    | 2330    | 5    | Atlantic  | Pacific   | Polar     | Arctic |
|      | -0.62 | -0.62  | 0.0015  | -16.00  | 0.000    | 5962    | 25123   | 5    | Atlantic  | Greenland | Walleye   | Arctic |
|      | 0.94  | 0.94   | 0.0001  | 90.47   | 0.000    | 67635   | 2163    | 5    | Atlantic  | Greenland | Pacific   | Arctic |
|      | -0.13 | -0.13  | 0.0004  | -6.75   | 0.000    | 1763    | 2310    | 5    | Atlantic  | Greenland | Polar     | Arctic |
|      | -0.83 | -0.83  | 0.0006  | -34.78  | 0.000    | 1143    | 12236   | 5    | Atlantic  | Polar     | Walleye   | Arctic |
|      | -0.66 | -0.66  | 0.0022  | -14.10  | 0.000    | 1756    | 8465    | 5    | Atlantic  | Polar     | Pacific   | Arctic |
|      | -0.66 | -0.66  | 0.0020  | -14.80  | 0.000    | 1763    | 8496    | 5    | Atlantic  | Polar     | Greenland | Arctic |
|      | -0.62 | -0.62  | 0.0019  | -14.22  | 0.000    | 6072    | 25588   | 5    | Walleye   | Pacific   | Atlantic  | Arctic |
|      | 0.94  | 0.94   | 0.0001  | 79.85   | 0.000    | 66013   | 2180    | 5    | Walleye   | Pacific   | Greenland | Arctic |
|      | 0.00  | 0.00   | 0.0001  | 0.21    | 1.000    | 1837    | 1828    | 5    | Walleye   | Pacific   | Polar     | Arctic |
| LG20 | -0.61 | -0.61  | 0.0019  | -14.01  | 0.000    | 6148    | 25123   | 5    | Walleye   | Greenland | Atlantic  | Arctic |
|      | 0.94  | 0.94   | 0.0001  | 91.48   | 0.000    | 66013   | 2077    | 5    | Walleye   | Greenland | Pacific   | Arctic |
|      | 0.01  | 0.01   | 0.0002  | 0.78    | 1.000    | 1849    | 1804    | 5    | Walleye   | Greenland | Polar     | Arctic |
|      | -0.75 | -0.75  | 0.0009  | -25.31  | 0.000    | 1735    | 12236   | 5    | Walleye   | Polar     | Atlantic  | Arctic |
|      | -0.65 | -0.65  | 0.0020  | -14.50  | 0.000    | 1837    | 8568    | 5    | Walleye   | Polar     | Pacific   | Arctic |
|      | -0.64 | -0.64  | 0.0020  | -14.54  | 0.000    | 1849    | 8548    | 5    | Walleye   | Polar     | Greenland | Arctic |
|      | 0.05  | 0.05   | 0.0000  | 11.23   | 0.000    | 2407    | 2163    | 5    | Pacific   | Greenland | Atlantic  | Arctic |
|      | 0.02  | 0.02   | 0.0004  | 1.28    | 1.000    | 2180    | 2077    | 5    | Pacific   | Greenland | Walleye   | Arctic |
|      | 0.03  | 0.03   | 0.0012  | 0.99    | 1.000    | 451     | 422     | 5    | Pacific   | Greenland | Polar     | Arctic |
|      | -0.57 | -0.57  | 0.0024  | -11.72  | 0.000    | 2330    | 8465    | 5    | Pacific   | Polar     | Atlantic  | Arctic |
|      | -0.65 | -0.65  | 0.0017  | -15.84  | 0.000    | 1828    | 8568    | 5    | Pacific   | Polar     | Walleye   | Arctic |
|      | -0.96 | -0.96  | 0.0000  | -156.25 | 0.000    | 451     | 23974   | 5    | Pacific   | Polar     | Greenland | Arctic |
|      | -0.57 | -0.57  | 0.0024  | -11.79  | 0.000    | 2310    | 8496    | 5    | Greenland | Polar     | Atlantic  | Arctic |
|      | -0.65 | -0.65  | 0.0017  | -15.61  | 0.000    | 1804    | 8548    | 5    | Greenland | Polar     | Walleye   | Arctic |
|      | -0.97 | -0.97  | 0.0000  | -165.43 | 0.000    | 422     | 23974   | 5    | Greenland | Polar     | Pacific   | Arctic |

Table S3. (continued)

|  | $D$   | $JK D$ | $VJK D$ | $Z$     | $P_{BY}$ | $nABBA$ | $nBABA$ | $BI$ | $H_1$     | $H_2$     | $H_3$     | $H_4$  |
|--|-------|--------|---------|---------|----------|---------|---------|------|-----------|-----------|-----------|--------|
|  | 0.06  | 0.06   | 0.0000  | 8.42    | 0.000    | 7077    | 6329    | 5    | Atlantic  | Walleye   | Pacific   | Arctic |
|  | 0.04  | 0.04   | 0.0000  | 7.56    | 0.000    | 6948    | 6433    | 5    | Atlantic  | Walleye   | Greenland | Arctic |
|  | -0.17 | -0.17  | 0.0006  | -6.82   | 0.000    | 1132    | 1591    | 5    | Atlantic  | Walleye   | Polar     | Arctic |
|  | -0.58 | -0.58  | 0.0008  | -20.81  | 0.000    | 7077    | 26862   | 5    | Atlantic  | Pacific   | Walleye   | Arctic |
|  | 0.92  | 0.92   | 0.0001  | 99.14   | 0.000    | 65485   | 2655    | 5    | Atlantic  | Pacific   | Greenland | Arctic |
|  | -0.19 | -0.19  | 0.0004  | -10.05  | 0.000    | 1598    | 2351    | 5    | Atlantic  | Pacific   | Polar     | Arctic |
|  | -0.58 | -0.58  | 0.0009  | -19.69  | 0.000    | 6948    | 26402   | 5    | Atlantic  | Greenland | Walleye   | Arctic |
|  | 0.93  | 0.93   | 0.0001  | 99.25   | 0.000    | 65485   | 2367    | 5    | Atlantic  | Greenland | Pacific   | Arctic |
|  | -0.20 | -0.20  | 0.0002  | -13.29  | 0.000    | 1557    | 2325    | 5    | Atlantic  | Greenland | Polar     | Arctic |
|  | -0.82 | -0.82  | 0.0002  | -62.07  | 0.000    | 1132    | 11228   | 5    | Atlantic  | Polar     | Walleye   | Arctic |
|  | -0.67 | -0.67  | 0.0003  | -36.59  | 0.000    | 1598    | 7946    | 5    | Atlantic  | Polar     | Pacific   | Arctic |
|  | -0.67 | -0.67  | 0.0003  | -39.11  | 0.000    | 1557    | 7975    | 5    | Atlantic  | Polar     | Greenland | Arctic |
|  | -0.62 | -0.62  | 0.0007  | -22.68  | 0.000    | 6329    | 26862   | 5    | Walleye   | Pacific   | Atlantic  | Arctic |
|  | 0.93  | 0.93   | 0.0001  | 90.69   | 0.000    | 63157   | 2433    | 5    | Walleye   | Pacific   | Greenland | Arctic |
|  | -0.09 | -0.09  | 0.0000  | -13.83  | 0.000    | 1633    | 1938    | 5    | Walleye   | Pacific   | Polar     | Arctic |
|  | -0.61 | -0.61  | 0.0008  | -21.67  | 0.000    | 6433    | 26402   | 5    | Walleye   | Greenland | Atlantic  | Arctic |
|  | 0.93  | 0.93   | 0.0001  | 91.12   | 0.000    | 63157   | 2346    | 5    | Walleye   | Greenland | Pacific   | Arctic |
|  | -0.09 | -0.09  | 0.0001  | -10.62  | 0.000    | 1601    | 1927    | 5    | Walleye   | Greenland | Polar     | Arctic |
|  | -0.75 | -0.75  | 0.0005  | -35.10  | 0.000    | 1591    | 11228   | 5    | Walleye   | Polar     | Atlantic  | Arctic |
|  | -0.66 | -0.66  | 0.0005  | -29.37  | 0.000    | 1633    | 8062    | 5    | Walleye   | Polar     | Pacific   | Arctic |
|  | -0.67 | -0.67  | 0.0005  | -30.83  | 0.000    | 1601    | 8036    | 5    | Walleye   | Polar     | Greenland | Arctic |
|  | 0.06  | 0.06   | 0.0001  | 6.74    | 0.000    | 2655    | 2367    | 5    | Pacific   | Greenland | Atlantic  | Arctic |
|  | 0.02  | 0.02   | 0.0001  | 2.11    | 0.273    | 2433    | 2346    | 5    | Pacific   | Greenland | Walleye   | Arctic |
|  | -0.02 | -0.02  | 0.0011  | -0.71   | 1.000    | 403     | 423     | 5    | Pacific   | Greenland | Polar     | Arctic |
|  | -0.54 | -0.54  | 0.0007  | -20.61  | 0.000    | 2351    | 7946    | 5    | Pacific   | Polar     | Atlantic  | Arctic |
|  | -0.61 | -0.61  | 0.0005  | -27.35  | 0.000    | 1938    | 8062    | 5    | Pacific   | Polar     | Walleye   | Arctic |
|  | -0.96 | -0.96  | 0.0000  | -147.47 | 0.000    | 403     | 21166   | 5    | Pacific   | Polar     | Greenland | Arctic |
|  | -0.55 | -0.55  | 0.0007  | -21.49  | 0.000    | 2325    | 7975    | 5    | Greenland | Polar     | Atlantic  | Arctic |
|  | -0.61 | -0.61  | 0.0005  | -27.45  | 0.000    | 1927    | 8036    | 5    | Greenland | Polar     | Walleye   | Arctic |
|  | -0.96 | -0.96  | 0.0000  | -149.48 | 0.000    | 423     | 21166   | 5    | Greenland | Polar     | Pacific   | Arctic |

LG21

Table S3. (continued)

|  | $D$   | $JK D$ | $VJK D$ | $Z$    | $P_{BY}$ | $nABBA$ | $nBABA$ | $BI$ | $H_1$     | $H_2$     | $H_3$     | $H_4$  |
|--|-------|--------|---------|--------|----------|---------|---------|------|-----------|-----------|-----------|--------|
|  | 0.09  | 0.09   | 0.0005  | 3.68   | 0.002    | 7629    | 6427    | 5    | Atlantic  | Walleye   | Pacific   | Arctic |
|  | 0.06  | 0.06   | 0.0005  | 2.49   | 0.101    | 7276    | 6492    | 5    | Atlantic  | Walleye   | Greenland | Arctic |
|  | -0.18 | -0.18  | 0.0004  | -8.38  | 0.000    | 1143    | 1635    | 5    | Atlantic  | Walleye   | Polar     | Arctic |
|  | -0.56 | -0.56  | 0.0045  | -8.31  | 0.000    | 7629    | 26996   | 5    | Atlantic  | Pacific   | Walleye   | Arctic |
|  | 0.92  | 0.92   | 0.0003  | 54.94  | 0.000    | 64365   | 2667    | 5    | Atlantic  | Pacific   | Greenland | Arctic |
|  | -0.19 | -0.19  | 0.0003  | -11.36 | 0.000    | 1635    | 2389    | 5    | Atlantic  | Pacific   | Polar     | Arctic |
|  | -0.57 | -0.57  | 0.0042  | -8.82  | 0.000    | 7276    | 26638   | 5    | Atlantic  | Greenland | Walleye   | Arctic |
|  | 0.93  | 0.93   | 0.0003  | 52.07  | 0.000    | 64365   | 2461    | 5    | Atlantic  | Greenland | Pacific   | Arctic |
|  | -0.20 | -0.20  | 0.0003  | -11.31 | 0.000    | 1575    | 2347    | 5    | Atlantic  | Greenland | Polar     | Arctic |
|  | -0.79 | -0.79  | 0.0014  | -21.50 | 0.000    | 1143    | 10000   | 5    | Atlantic  | Polar     | Walleye   | Arctic |
|  | -0.61 | -0.61  | 0.0014  | -16.58 | 0.000    | 1635    | 6844    | 5    | Atlantic  | Polar     | Pacific   | Arctic |
|  | -0.63 | -0.63  | 0.0014  | -17.04 | 0.000    | 1575    | 6849    | 5    | Atlantic  | Polar     | Greenland | Arctic |
|  | -0.62 | -0.62  | 0.0023  | -12.84 | 0.000    | 6427    | 26996   | 5    | Walleye   | Pacific   | Atlantic  | Arctic |
|  | 0.92  | 0.92   | 0.0003  | 52.34  | 0.000    | 61734   | 2413    | 5    | Walleye   | Pacific   | Greenland | Arctic |
|  | -0.07 | -0.07  | 0.0002  | -5.27  | 0.000    | 1687    | 1952    | 5    | Walleye   | Pacific   | Polar     | Arctic |
|  | -0.61 | -0.61  | 0.0023  | -12.69 | 0.000    | 6492    | 26638   | 5    | Walleye   | Greenland | Atlantic  | Arctic |
|  | 0.92  | 0.92   | 0.0004  | 43.80  | 0.000    | 61734   | 2488    | 5    | Walleye   | Greenland | Pacific   | Arctic |
|  | -0.08 | -0.08  | 0.0001  | -7.57  | 0.000    | 1632    | 1929    | 5    | Walleye   | Greenland | Polar     | Arctic |
|  | -0.72 | -0.72  | 0.0015  | -18.57 | 0.000    | 1635    | 10000   | 5    | Walleye   | Polar     | Atlantic  | Arctic |
|  | -0.62 | -0.62  | 0.0011  | -18.60 | 0.000    | 1687    | 7084    | 5    | Walleye   | Polar     | Pacific   | Arctic |
|  | -0.62 | -0.62  | 0.0011  | -19.15 | 0.000    | 1632    | 7041    | 5    | Walleye   | Polar     | Greenland | Arctic |
|  | 0.04  | 0.04   | 0.0001  | 3.39   | 0.006    | 2667    | 2461    | 5    | Pacific   | Greenland | Atlantic  | Arctic |
|  | -0.02 | -0.02  | 0.0002  | -1.09  | 1.000    | 2413    | 2488    | 5    | Pacific   | Greenland | Walleye   | Arctic |
|  | -0.03 | -0.03  | 0.0009  | -0.97  | 1.000    | 433     | 460     | 5    | Pacific   | Greenland | Polar     | Arctic |
|  | -0.48 | -0.48  | 0.0011  | -14.42 | 0.000    | 2389    | 6844    | 5    | Pacific   | Polar     | Atlantic  | Arctic |
|  | -0.57 | -0.57  | 0.0009  | -19.00 | 0.000    | 1952    | 7084    | 5    | Pacific   | Polar     | Walleye   | Arctic |
|  | -0.96 | -0.96  | 0.0001  | -80.00 | 0.000    | 433     | 19599   | 5    | Pacific   | Polar     | Greenland | Arctic |
|  | -0.49 | -0.49  | 0.0012  | -13.89 | 0.000    | 2347    | 6849    | 5    | Greenland | Polar     | Atlantic  | Arctic |
|  | -0.57 | -0.57  | 0.0009  | -18.66 | 0.000    | 1929    | 7041    | 5    | Greenland | Polar     | Walleye   | Arctic |
|  | -0.95 | -0.95  | 0.0001  | -84.02 | 0.000    | 460     | 19599   | 5    | Greenland | Polar     | Pacific   | Arctic |

LG22

Table S3. (continued)

|       | $D$   | JK $D$ | V.JK $D$ | $Z$     | $P_{BY}$ | $nABBA$ | $nBABA$ | BI        | $H_1$     | $H_2$     | $H_3$     | $H_4$  |
|-------|-------|--------|----------|---------|----------|---------|---------|-----------|-----------|-----------|-----------|--------|
|       | 0.07  | 0.07   | 0.0001   | 8.00    | 0.000    | 8499    | 7344    | 5         | Atlantic  | Walleye   | Pacific   | Arctic |
|       | 0.06  | 0.06   | 0.0001   | 4.69    | 0.000    | 8285    | 7402    | 5         | Atlantic  | Walleye   | Greenland | Arctic |
|       | -0.18 | -0.18  | 0.0002   | -13.21  | 0.000    | 1355    | 1970    | 5         | Atlantic  | Walleye   | Polar     | Arctic |
|       | -0.51 | -0.51  | 0.0036   | -8.52   | 0.000    | 8499    | 26415   | 5         | Atlantic  | Pacific   | Walleye   | Arctic |
|       | 0.92  | 0.92   | 0.0001   | 102.13  | 0.000    | 67671   | 2899    | 5         | Atlantic  | Pacific   | Greenland | Arctic |
|       | -0.16 | -0.16  | 0.0009   | -5.36   | 0.000    | 1939    | 2663    | 5         | Atlantic  | Pacific   | Polar     | Arctic |
|       | -0.52 | -0.52  | 0.0038   | -8.41   | 0.000    | 8285    | 25977   | 5         | Atlantic  | Greenland | Walleye   | Arctic |
|       | 0.92  | 0.92   | 0.0001   | 95.21   | 0.000    | 67671   | 2653    | 5         | Atlantic  | Greenland | Pacific   | Arctic |
|       | -0.17 | -0.17  | 0.0009   | -5.56   | 0.000    | 1888    | 2637    | 5         | Atlantic  | Greenland | Polar     | Arctic |
|       | -0.78 | -0.78  | 0.0005   | -35.34  | 0.000    | 1355    | 10881   | 5         | Atlantic  | Polar     | Walleye   | Arctic |
|       | -0.59 | -0.59  | 0.0003   | -35.84  | 0.000    | 1939    | 7462    | 5         | Atlantic  | Polar     | Pacific   | Arctic |
|       | -0.60 | -0.60  | 0.0002   | -45.23  | 0.000    | 1888    | 7514    | 5         | Atlantic  | Polar     | Greenland | Arctic |
|       | -0.56 | -0.56  | 0.0025   | -11.28  | 0.000    | 7344    | 26415   | 5         | Walleye   | Pacific   | Atlantic  | Arctic |
|       | 0.92  | 0.92   | 0.0001   | 81.56   | 0.000    | 65014   | 2685    | 5         | Walleye   | Pacific   | Greenland | Arctic |
| LG23  | -0.04 | -0.04  | 0.0005   | -1.61   | 0.819    | 2007    | 2156    | 5         | Walleye   | Pacific   | Polar     | Arctic |
|       | -0.56 | -0.56  | 0.0025   | -11.08  | 0.000    | 7402    | 25977   | 5         | Walleye   | Greenland | Atlantic  | Arctic |
|       | 0.92  | 0.92   | 0.0001   | 87.23   | 0.000    | 65014   | 2628    | 5         | Walleye   | Greenland | Pacific   | Arctic |
|       | -0.04 | -0.04  | 0.0005   | -1.81   | 0.534    | 1962    | 2129    | 5         | Walleye   | Greenland | Polar     | Arctic |
|       | -0.69 | -0.69  | 0.0007   | -26.58  | 0.000    | 1970    | 10881   | 5         | Walleye   | Polar     | Atlantic  | Arctic |
|       | -0.59 | -0.59  | 0.0002   | -44.75  | 0.000    | 2007    | 7764    | 5         | Walleye   | Polar     | Pacific   | Arctic |
|       | -0.60 | -0.60  | 0.0001   | -49.18  | 0.000    | 1962    | 7760    | 5         | Walleye   | Polar     | Greenland | Arctic |
|       | 0.04  | 0.04   | 0.0001   | 3.62    | 0.002    | 2899    | 2653    | 5         | Pacific   | Greenland | Atlantic  | Arctic |
|       | 0.01  | 0.01   | 0.0001   | 1.46    | 1.000    | 2685    | 2628    | 5         | Pacific   | Greenland | Walleye   | Arctic |
|       | 0.01  | 0.01   | 0.0003   | 0.35    | 1.000    | 495     | 489     | 5         | Pacific   | Greenland | Polar     | Arctic |
|       | -0.47 | -0.47  | 0.0003   | -25.85  | 0.000    | 2663    | 7462    | 5         | Pacific   | Polar     | Atlantic  | Arctic |
|       | -0.57 | -0.57  | 0.0002   | -41.01  | 0.000    | 2156    | 7764    | 5         | Pacific   | Polar     | Walleye   | Arctic |
|       | -0.96 | -0.96  | 0.0000   | -181.21 | 0.000    | 495     | 21992   | 5         | Pacific   | Polar     | Greenland | Arctic |
|       | -0.48 | -0.48  | 0.0004   | -24.99  | 0.000    | 2637    | 7514    | 5         | Greenland | Polar     | Atlantic  | Arctic |
| -0.57 | -0.57 | 0.0002 | -41.13   | 0.000   | 2129     | 7760    | 5       | Greenland | Polar     | Walleye   | Arctic    |        |
| -0.96 | -0.96 | 0.0000 | -151.07  | 0.000   | 489      | 21992   | 5       | Greenland | Polar     | Pacific   | Arctic    |        |

**Table S4.  $D_{\text{FOIL}}$  statistics of admixture and introgression.** Based on method and software from (59). All tests of  $D$  statistics were statistically significant determined by a  $\chi^2$  goodness of fit test. However, the comparisons did not show the diagnostic patterns with at least one non-significant  $D$  that are necessary for detecting the direction of introgression (59). Also given in the lower panel are checks of concordance and discordance, that divergence is correctly ordered, and that terminal substitutions are higher among inner than outer taxa. Taxon labels are Greenland for Greenland cod, Pacific for Pacific cod, Walleye for walleye pollock, Arctic for Arctic cod, Atl\_Ice and Atl\_Tri for Atlantic cod from Iceland and Trinity Bay Newfoundland respectively. Based on the `gadmor1` assembly used by (29).

| Tree                                                | $D_{FO}$ | $D_{IL}$ | $D_{FI}$ | $D_{OL}$ |
|-----------------------------------------------------|----------|----------|----------|----------|
| (((Greenland, Pacific), Atl_Ice), Walleye), Arctic) | -0.006   | -0.006   | -0.027   | -0.028   |
| (((Atl_Ice, Atl_Tri), Walleye), Pacific), Arctic)   | +0.261   | +0.261   | -0.013   | -0.012   |

| Tree                                                | Concordance ><br>Discordance | Order<br>$P_1/\backslash P_2 < P_3/\backslash P_4$ | Terminal<br>B/A:A/B |
|-----------------------------------------------------|------------------------------|----------------------------------------------------|---------------------|
| (((Greenland, Pacific), Atl_Ice), Walleye), Arctic) | Pass                         | Pass                                               | Pass                |
| (((Atl_Ice, Atl_Tri), Walleye), Pacific), Arctic)   | Con < Dis                    | Pass                                               | Pass                |



**Table S5. Summary statistics of sequencing coverage.** Mean  $\bar{Y}$ , first quartile  $Q_1$ , median  $M$ , third quartile  $Q_3$ , and standard deviation  $s$ . Coverage was estimated with `samtools depth`.

|    | Taxon             | $\bar{Y}$ | $Q_1$ | $M$ | $Q_3$ | $s$  |
|----|-------------------|-----------|-------|-----|-------|------|
| 1  | Arctic cod        | 12.0      | 5     | 8   | 12    | 55.9 |
| 2  | Polar cod         | 2.8       | 1     | 2   | 3     | 18.0 |
| 3  | Greenland cod     | 17.8      | 9     | 14  | 20    | 54.6 |
| 5  | Pacific cod       | 27.5      | 15    | 23  | 30    | 74.3 |
| 4  | Walleye pollock   | 20.6      | 11    | 17  | 22    | 70.6 |
| 6  | Atlantic cod Sab  | 23.9      | 12    | 20  | 29    | 57.0 |
| 7  | Atlantic cod Tri  | 45.2      | 30    | 40  | 49    | 87.6 |
| 8  | Atlantic cod Ice7 | 28.3      | 18    | 24  | 31    | 63.5 |
| 9  | Atlantic cod Ice3 | 25.9      | 16    | 22  | 29    | 61.9 |
| 10 | Atlantic cod Nse2 | 26.4      | 17    | 23  | 29    | 61.6 |
| 11 | Atlantic cod Nse8 | 30.1      | 20    | 26  | 32    | 69.6 |

**Table S6. Number of parsimony informative sites, number of blocks of 5000 parsimony-informative characters and number of mdl generated “recombinational genes” used in the SNaQ (32) analysis of different linkage groups.**

| Linkage Group | Number of                   |        |           |
|---------------|-----------------------------|--------|-----------|
|               | Parsimony informative sites | Blocks | mdl genes |
| LG01          | 664687                      | 169428 | 4259      |
| LG02          | 565196                      | 144078 | 3788      |
| LG03          | 620023                      | 158101 | 4627      |
| LG04          | 811548                      | 206686 | 6246      |
| LG05          | 528925                      | 134695 | 3884      |
| LG06          | 532314                      | 135450 | 3786      |
| LG07          | 702590                      | 178851 | 4752      |
| LG08          | 579539                      | 147706 | 4376      |
| LG09          | 547265                      | 139251 | 3910      |
| LG10          | 556124                      | 141603 | 3887      |
| LG11          | 585207                      | 149181 | 4139      |
| LG12          | 592669                      | 150828 | 4002      |
| LG13          | 538737                      | 137166 | 3764      |
| LG14          | 616864                      | 157015 | 4391      |
| LG15          | 542853                      | 138135 | 3952      |
| LG16          | 632901                      | 161115 | 4577      |
| LG17          | 437674                      | 111303 | 3332      |
| LG18          | 506250                      | 128866 | 3750      |
| LG19          | 484376                      | 123390 | 3611      |
| LG20          | 484296                      | 123346 | 3478      |
| LG21          | 489167                      | 124578 | 3540      |
| LG22          | 477190                      | 121378 | 3552      |
| LG23          | 350990                      | 89305  | 2985      |
| Median        | 547265                      | 139251 | 3887      |
